# Supplementary material
Source: PubMed Central journal article supplement (PMC4720318)
Supplement: pnas.1518445113.sapp.pdf [file pnas.1518445113.sapp.pdf]

# Neolithic and Bronze Age migration to Ireland and establishment of the insular Atlantic genome.

## SI Appendix

Lara M. Cassidy<sup>a,1</sup>, Rui Martiniano<sup>a,1</sup>, Eileen M. Murphy<sup>b</sup>, Matthew D. Teasdale<sup>a</sup>, Jim Mallory<sup>b</sup>,  
Barrie Hartwell<sup>b</sup>, Daniel G Bradley<sup>a,2</sup>

<sup>a</sup>Smurfit Institute of Genetics, Trinity College, Dublin 2, Ireland

<sup>b</sup>School of Geography, Archaeology & Palaeoecology, Queen's University Belfast, Belfast BT7  
1NN, Northern Ireland

<sup>1</sup>LMC and RM contributed equally to this work

<sup>2</sup>To whom correspondence should be addressed. Email: [dbradley@tcd.ie](mailto:dbradley@tcd.ie)

# Contents

|                                                                                                                         |    |
|-------------------------------------------------------------------------------------------------------------------------|----|
| <b>S1: Archaeological Context</b> .....                                                                                 | 3  |
| <b>S1.1 Ballynahatty</b> .....                                                                                          | 3  |
| <b>S1.2 Rathlin Island</b> .....                                                                                        | 3  |
| <b>S2: Sampling and Extraction</b> .....                                                                                | 6  |
| <b>S3: Library Creation and Sequencing</b> .....                                                                        | 8  |
| <b>S4: Data Processing and Read Mapping</b> .....                                                                       | 10 |
| <b>S4.1 Irish Sequencing Data</b> .....                                                                                 | 10 |
| <b>S4.2 Published Ancient Data</b> .....                                                                                | 11 |
| <b>S4.2.1 Skoglund et al. (2014), Lazaridis et al. (2014), Allentoft et al. (2015) &amp; Günther et al (2015)</b> ...11 |    |
| <b>S4.2.2 Gamba et al. (2014)</b> .....                                                                                 | 11 |
| <b>S4.2.3 Olalde et al. (2014) &amp; Olalde et al. (2015)</b> .....                                                     | 12 |
| <b>S4.2.4 Keller et al. (2012)</b> .....                                                                                | 12 |
| <b>S4.2.5 Haak et al. (2015)</b> .....                                                                                  | 12 |
| <b>S5: Data Authenticity</b> .....                                                                                      | 13 |
| <b>S5.1 Negative Control Analysis</b> .....                                                                             | 13 |
| <b>S5.2 Patterns of molecular damage and sequence length distribution</b> .....                                         | 14 |
| <b>S5.3 Mitochondrial contamination estimates</b> .....                                                                 | 14 |
| <b>S5.4 X-chromosome contamination estimates</b> .....                                                                  | 15 |
| <b>S6: Molecular Sex Determination</b> .....                                                                            | 23 |
| <b>S7: Mitochondrial Genome Analysis</b> .....                                                                          | 25 |
| <b>S8: Y Chromosome Analysis</b> .....                                                                                  | 28 |
| <b>S9: Genotype calling and merging with modern datasets</b> .....                                                      | 32 |
| <b>S9.1 Human Origins Dataset</b> .....                                                                                 | 32 |
| <b>S9.2 Hellenthal et al. 2014 Dataset</b> .....                                                                        | 33 |
| <b>S9.3 1000 Genomes Phase 3 v5 and Simons Genome Diversity Project Datasets</b> .....                                  | 33 |
| <b>S10: Principal Component Analysis</b> .....                                                                          | 38 |
| <b>S11: ADMIXTURE Analysis</b> .....                                                                                    | 43 |
| <b>S12: Formal Tests of Admixture implemented with D- and f-Statistics</b> .....                                        | 47 |
| <b>S12.1 Outgroup f<sub>3</sub>-statistics</b> .....                                                                    | 47 |
| <b>S12.2 D-Statistics</b> .....                                                                                         | 48 |
| <b>S12.2.1 Neolithic Ballynahatty</b> .....                                                                             | 48 |
| <b>S12.2.2 Bronze Age Rathlin</b> .....                                                                                 | 50 |
| <b>S13: Runs of Homozygosity</b> .....                                                                                  | 54 |
| <b>S14: Haplotype-based Analysis with ChromoPainter</b> .....                                                           | 56 |
| <b>S15: Phenotypic Analysis</b> .....                                                                                   | 61 |
| <b>S15.1 Pigmentation</b> .....                                                                                         | 61 |
| <b>S15.2 ABO blood groupings</b> .....                                                                                  | 62 |
| <b>S15.3 Genetic Disorders at high frequency in present day Ireland</b> .....                                           | 62 |
| <b>S15.4 Classical HLA typing</b> .....                                                                                 | 63 |
| <b>S15.5 SNPs with evidence of recent positive selection in humans</b> .....                                            | 64 |
| <b>References</b> .....                                                                                                 | 77 |

# S1: Archaeological Context

## S1.1 Ballynahatty

The individual from Ballynahatty (A.64) was a female with an age-at-death of 18-35 years (1). Her remains were discovered in 1855 and comprised a near-complete skull recovered from the interior of a subterranean stone burial chamber discovered in a field to the north of the well-known henge monument, the Giant's Ring. The burial structure was sub-circular and its interior had been divided into a series of compartments – the skull was recovered from Compartment D and was associated with a collection of disarticulated bone and fragments of cremated bone. Radiocarbon dating of the cranium produced a result of 3343-3020 cal BC (UB-7059; 4465± 38 BP) at 95% probability (2), which places the individual into the later Middle Neolithic, or possibly Late Neolithic, periods (3). Her burial context, based on 19th century drawings and reports, is unusual in that its morphology does not readily fit within any of the recognised megalithic tomb traditions, although is most similar to passage grave structures.

## S1.2 Rathlin Island

The three individuals from Rathlin Island were discovered during excavations in Church Bay in 2006 (4). The style of burial, the associated pottery and radiocarbon dates derived from the three individuals (Table S1.1) indicated that they were Early Bronze Age in date. C127 was a 40-60 year old male who had been buried in the interior of a stone cist (C124). He was lying on his left side in a crouched position along a north-south orientation, with the head to the north. He was a robust individual who would have had a height of approximately 5'11". His bones revealed signs of an active lifestyle and osteoarthritis, Schmorl's nodes and torsion of a number of lumbar spinous processes were apparent in his vertebrae, while os acromiale was visible in his left scapula. The tuber of his left calcaneus displayed healed lytic lesions which may have been caused by a soft tissue injury of his heel at some stage during his life (5). The remains of a complete tripartite bowl Food Vessel were recovered adjacent to his lower legs in the south-east corner of the cist (6). C122 (Sk 1) and C105 (Sk 2) were both young adult males whose disarticulated remains were recovered in association with a disturbed cist (C112) adjacent to the complete cist (C124). Disarticulated bone from an adult female was also recovered from the deposit. Signs of infection or inflammation were visible in the right parietal and mastoid region of the cranium of C122 (Sk 1) and in the right scapula of C105 (Sk 2) (5). The practice of using a single cist for the interment of

multiple individuals was also identified during excavations on Rathlin during the 1980s when Kenny Wiggins discovered a cist that contained the remains of at least five individuals (Grave 2). Interestingly, the radiocarbon dates of C122 (Sk 1) and C105 (Sk 2) revealed that it would have been impossible for them to have been buried at the same time. As such, it is possible that the cist had been re-opened at some stage to facilitate further burials or that one of the individuals was an 'ancestor' whose remains had been curated for a period of time prior to their burial in the cist (4).

**Table S1.1 Radiocarbon dates and archaeological contexts for four ancient Irish individuals.**

| Site                   | Archaeological ID | Lab ID | Sample ID    | C14 Lab Code | Radiocarbon Age BP | Calibrated date (95% probability) (Schulking et al. 2011, Reimer et al. 2004) | Context                  |
|------------------------|-------------------|--------|--------------|--------------|--------------------|-------------------------------------------------------------------------------|--------------------------|
| Ballynahatty, Co. Down | A.64              | BA64   | Ballynahatty | UB-7059      | 4465 ± 38          | 3343-3020 BC                                                                  | Middle to Late Neolithic |
| Glebe, Rathlin Island  | C 127             | RM127  | Rathlin1     | UBA-8707     | 3591 ± 29          | 2026-1885 BC                                                                  | Early Bronze Age         |
| Glebe, Rathlin Island  | C 122 (Sk 1)      | RSK1   | Rathlin2     | UBA-8705     | 3539 ± 54          | 2024-1741 BC                                                                  | Early Bronze Age         |
| Glebe, Rathlin Island  | C 105 (Sk 2)      | RSK2   | Rathlin3     | UBA-8706     | 3354 ± 28          | 1736-1534 BC                                                                  | Early Bronze Age         |

## S2: Sampling and Extraction

The petrous portion of the temporal bone from was obtained from the four ancient individuals. For two of these samples, Ballynahatty (A.64) and Rathlin1 (C127), the petrous was detached from the intact cranium using a dremel diamond wheel attached to a dental drill. This sampling took place in the School of Geography, Archaeology and Palaeoecology at Queen's University Belfast. The petrous bones were then transported to the Department of Genetics, TCD whereby all further sample preparation took place in facilities dedicated to ancient DNA analysis. Full body suits, face masks, gloves and hairnets were worn throughout the drilling, extraction and library creation processes. All tools and surfaces were consecutively cleaned with bleach, DNA-ExitusPlus, Ethanol and long exposures to UV light.

The samples were UV-irradiated for 20 minutes on each side. The surface of each bone was removed using a standard dentistry drill with a dremel engraving cutter attached. Fine powder was subsequently obtained from each sample with a Mixer Mill (MM 400, Retsch). DNA was extracted from approximately 150 mg of the sample bone powder produced, following the protocol outlined in (7) with modifications introduced by (8). An extraction control (1ml ddH<sub>2</sub>O) was carried throughout the procedure to keep account of possible modern exogenous DNA contamination and sample cross contamination.

Bone powder was placed in 1ml of lysis buffer (20 mM Tris HCL, pH 7.4; 47.5 mM EDTA, pH 8; 0.7% Sarkosyl NL30; 0.65 U/ml Proteinase K, recombinant, PCR Grade) and rotated at 300rpm for 24 hours at 55°C followed by 24 hours at 37°C. The samples were then spun at 10,000rpm for 4 mins and the supernatant was removed. A following 1ml of lysis buffer was added to the remaining pellets and the incubation step was repeated. After incubation the samples were centrifuged at 13,000rpm for 12 mins and the supernatant of each was transferred to an Amicon Ultra-4 Centrifugal Filter Unit 30kDA. Each sample was diluted in 3ml of 10mM Tris-EDTA Buffer and centrifuged at 2,500rpm until 250µl of the solution remained (12-20mins). The resulting flow through was discarded and another 3ml of 10mM Tris-EDTA Buffer was added to the filter. The samples were then spun at 2,500rpm until a final volume of 100µl was obtained (15-25mins).

Each extract was transferred from the filter to a silica column (MinElute PCR Purification Kit, Qiagen, Hilden, Germany) and purified following the manufacturer's instructions. Briefly, PB buffer was added to the silica column at approximately 5 times the volume of the extract. After the sample was spun at 13,000rpm for 1 minute and the flow through discarded, 750µl of PE buffer was added to the column. The sample was spun at 13,000rpm for a subsequent two minutes or until there was no visible liquid left.

Elution buffer (EB) at volume of 35 $\mu$ l was added to the column membrane and the sample DNA released from the filter by centrifugation at 13,000rpm for 1 minute into a fresh 1.5ml centrifuge tube.

### S3: Library Creation and Sequencing

Libraries were prepared using 30µl of DNA extract following the method outlined in (9) with the following modifications as in (10): no DNA shearing by sonication was carried out due to the highly fragmented nature of ancient DNA molecules. All DNA purification steps were performed using the MinElute PCR Purification kit protocol as described above. Blunt end repair was done using NEBNext End Repair Module (New England BioLab Inc.), with all components scaled to 70% of the manufacturer's recommended volume, giving a final reaction volume of 70µl. This volume was then incubated for 15 min at 25°C followed by 5 min at 12°C. The final modification was the termination of Bst polymerase activity after the adapter fill-in reaction through the addition of a heat inactivation step (80°C for 20 min).

The library amplification reaction was set up for all samples and controls using Accuprime Pfx Supermix (Life Technology), primer IS4 (0.2µM), a specific indexing primer (0.2µM) and 3µl of sample library, with a total reaction volume of 25µl. Amplification took place under the following thermal cycling conditions: 5 min at 95°C; 12 cycles of 15 sec at 95°C, 30 sec at 60°C and 30 sec at 68°C; and a final extension step of 5 min at 68°C. The resulting PCR product was purified using the MinElute PCR Purification kit protocol described previously.

Quantification and quality assessment of the amplified libraries was performed on an Agilent 2100 Bioanalyzer, using a DNA-1000 chip and following manufacturer's protocol.

One amplified library from each sample was first screened on an Illumina MiSeq platform (Trinity Genome Sequencing Laboratory, Trinity College Dublin, Ireland) using 70 bp single-end sequencing and following the manufacturer's instructions for multiplex sequencing. The results of this sequencing were used to estimate endogenous DNA contents (Main Paper, Table 1; Table S3.1). Three additional amplified libraries were then created for each sample and these were subsequently sequenced on an Illumina HiSeq 2000 Platform using 100bp single-end sequencing at Beckman Coulter Genomics, Danvers, MA. Libraries from samples Ballynahatty and Rathlin1 were sequenced on 8 lanes in total between them, while samples Rathlin2 and Rathlin3 were sequenced on one shared lane. Sequencing results are displayed in Table S3.1.



**Table S3.1. Summary of sequencing and alignment statistics for all sample libraries.**

| <b>Sample ID</b> | <b>Library ID</b> | <b>Sequencing Platform</b> | <b>Raw Reads with length &gt;34bp after adapter trimming</b> | <b>Total Mapped reads</b> | <b>Unique Reads with mapping quality &gt;30</b> | <b>Duplication</b> | <b>Final Endogenous Content</b> |
|------------------|-------------------|----------------------------|--------------------------------------------------------------|---------------------------|-------------------------------------------------|--------------------|---------------------------------|
| Ballynahatty     | LIB1-10           | Illumina MiSeq             | 1932299                                                      | 1610081                   | 1311289                                         | 0.24%              | 67.86%                          |
| Ballynahatty     | LIB1-23           | Illumina HiSeq2000         | 284353240                                                    | 236162337                 | 166262242                                       | 14.58%             | 58.47%                          |
| Ballynahatty     | LIB1-24           | Illumina HiSeq2000         | 261340137                                                    | 217496196                 | 153125411                                       | 14.61%             | 58.59%                          |
| Ballynahatty     | LIB1-25           | Illumina HiSeq2000         | 297458417                                                    | 247335459                 | 163489349                                       | 19.86%             | 54.96%                          |
| Rathlin1         | LIB1-12           | Illumina MiSeq             | 1157817                                                      | 847143                    | 703264                                          | 0.18%              | 60.74%                          |
| Rathlin1         | LIB1-26           | Illumina HiSeq2000         | 275487235                                                    | 200501983                 | 148289824                                       | 14.12%             | 53.83%                          |
| Rathlin1         | LIB1-27           | Illumina HiSeq2000         | 243046349                                                    | 176890003                 | 132415709                                       | 13.01%             | 54.48%                          |
| Rathlin1         | LIB1-28           | Illumina HiSeq2000         | 241777482                                                    | 175970753                 | 131720012                                       | 13.06%             | 54.48%                          |
| Rathlin2         | LIB1-08           | Illumina MiSeq             | 1690602                                                      | 800137                    | 644959                                          | 0.14%              | 38.15%                          |
| Rathlin2         | LIB1-75           | Illumina HiSeq2000         | 42786666                                                     | 19812965                  | 16165004                                        | 2.17%              | 37.78%                          |
| Rathlin2         | LIB1-76           | Illumina HiSeq2000         | 73697710                                                     | 34320081                  | 27744257                                        | 3.04%              | 37.65%                          |
| Rathlin2         | LIB1-77           | Illumina HiSeq2000         | 58266248                                                     | 27150183                  | 22020894                                        | 2.68%              | 37.79%                          |
| Rathlin3         | LIB1-09           | Illumina MiSeq             | 2281602                                                      | 1706599                   | 1401348                                         | 0.20%              | 61.42%                          |
| Rathlin3         | LIB1-90           | Illumina HiSeq2000         | 15536366                                                     | 11183917                  | 9417979                                         | 1.23%              | 60.62%                          |
| Rathlin3         | LIB1-91           | Illumina HiSeq2000         | 15188194                                                     | 10880384                  | 9146209                                         | 1.26%              | 60.22%                          |
| Rathlin3         | LIB1-92           | Illumina HiSeq2000         | 18409063                                                     | 13210282                  | 11113844                                        | 1.29%              | 60.37%                          |

Four amplified libraries were created for each sample. Final endogenous content refers to the percentage human DNA in the library after filtering by mapping quality (>30) and removing PCR duplicate reads.

## S4: Data Processing and Read Mapping

### S4.1 Irish Sequencing Data

Only reads with an exact match to the correct index sequence were retained for analysis to guard against possible contamination. The majority of aDNA molecules are short enough that single-end reads carry part of the P7 adapter at the 3' end. These residual adapter sequences were trimmed from reads using cutadapt v1.2.1 (11), with parameters enabled to discard reads under 34bp in length after trimming (-m 34) and to allow a minimum overlap of 1bp between the read and adapter (-O 1).

All remaining trimmed sequences were subsequently mapped to the human reference genome (hg19/GRCh37) with the mitochondrial genome replaced by the revised Cambridge reference sequence (Accession number NC\_012920.1). BWA version 0.7.5 (12) was used for alignment with the seed disabled (-l 16500) as recommended in (13), the edit distance set to 0.02 to allow for more substitutions (-n 0.02) and the amount of gaps allowed raised (-o 2).

Read groups were added using Picard Tools v1.101 (<http://broadinstitute.github.io/picard/>). Reads were sorted using Samtools v0.1.19 (14) and reads with a mapping quality below 30 were at this point discarded from all further analysis. BAM files were merged to sample level using the MergeSamFiles Picard tool and PCR duplicates removed with Samtools (14). The RealignerTargetCreator and IndelRealigner tools from GenomeAnalysisTK v2.4-7 (15) were used to locally realign reads.

DNA damage patterns were assessed using mapDamage 2.0 (16) and the base quality scores of likely deaminated positions in reads were rescaled based on these patterns, as well as their initial qualities and their position in the read. As an additional safeguard to the high frequency of misincorporation sites found at read ends, each read had the base quality of two base pairs at both its 5' and 3' ends reduced to a PHRED score of 2.

The depth of genome coverage for each sample was estimated using Qualimap v2.1.1 (17).

## **S4.2 Published Ancient Data**

Ancient data from twelve previous studies (10, 18–28) was processed alongside the four Irish genomes for use in downstream analyses. Information regarding the ancient samples included in this study can be found in Table S9.1.

### **S4.2.1 Skoglund et al. (2014), Lazaridis et al. (2014), Allentoft et al. (2015) & Günther et al. (2015)**

BAM files were obtained from (19, 21, 26, 27) and realigned to the human reference genome (hg19/GRCh37) with the mitochondrial genome replaced by the revised Cambridge reference sequence (rCRS) with parameters as in S4.1. Following realignment the mapped reads were processed as described in S4.1, with modifications introduced for the data from (21) and (26). Firstly, in order to remain consistent with the data processing pipeline outlined in section S4.1, reads below 34bp in length were discarded. Secondly, for the data from (21), whose sample libraries were treated with Uracil-DNA-glycosylase (UDG) to remove deaminated cytosines and thus change typical aDNA damage patterns, mapDamage rescaling was not performed on this data. Iron Age individuals from (26) were not included in this study.

We only included in main analyses the genomes from these studies with a minimum of 200,000 secure genotype calls from the 354,212 SNPS targeted in (25) that overlap with the Affymetrix Human Origins array (21). For additional analyses with the Hellenthal et al, 2014 dataset (see Section S9) a minimum of 200,000 overlapping genotype calls with this dataset were required, increasing the number of eligible samples from (26) from 18 to 24.

### **S4.2.2 Gamba et al. (2014)**

BAM files from (10) had their base qualities rescaled using mapDamage 2.0 and reads below 34bp in length were removed. It was not necessary to reduce the base quality of the first and last two base pairs on reads from these samples as these positions had previously been removed before mapping. Only samples above 0.81X coverage were included in further analysis. Iron Age individuals from this study were not included in analysis.

#### **S4.2.3 Olalde et al. (2014) & Olalde et al. (2015)**

Fastq files from (20, 28) were downloaded and aligned to the human reference genome (hg19/GRCh37) with the mitochondrial genome replaced by the revised Cambridge reference sequence (rCRS) and were subsequently processed as outlined in S4.1. In addition, reads below 34bp in length were removed. Only one individual, CB13, from (28) possessed sufficient genome coverage to be included in this study.

#### **S4.2.4 Keller et al. (2012)**

Fastq files representing both the forward read of each pair and singletons were downloaded from (18). The files were aligned to the human reference genome (hg19/GRCh37) with the mitochondrial genome replaced by the revised Cambridge Reference Sequence (rCRS) and mapped reads were processed as described in section S4.1, with reads below 34bp in length removed.

#### **S4.2.5 Haak et al. (2015)**

Ancient genotype data covering a subset of SNPs from the Human Origins array (21) was downloaded from (25). In addition to the genotypes for samples sequenced by these authors, the data downloaded included genotypes for three pleistocene hunter gatherers sequenced in separate studies (22–24). Only samples with a minimum of 200,000 genotype calls were considered.

## S5: Data Authenticity

### S5.1 Negative Control Analysis

As described previously in section S2, stringent anti-contamination measures were taken during bone drilling, DNA extraction and library creation, all of which were carried out in clean room facilities dedicated to ancient DNA analysis. Full body suits, face masks, gloves and hairnets were worn and all tools and surfaces were consecutively cleaned with bleach, DNA-ExitusPlus, Ethanol and long exposure to UV light.

To assess the effectiveness of these contamination safeguards negative controls were introduced during each stage of sample processing and sequenced alongside the four Irish samples on the Illumina MiSeq platform (Trinity Genome Sequencing Laboratory, Trinity College Dublin, Ireland). Two controls were introduced during the drilling stage, an air control and a water control. The air control consisted of an empty 2ml Eppendorf tube which was allowed to sit open for an hour in the cleaned work area prior to sample drilling. For the water control, 2ml of ddH<sub>2</sub>O was shaken in the Mixer Mill (MM 400, Retsch), used to obtain fine powder from bone, after bleaching and UV exposure. An extraction control of 1ml ddH<sub>2</sub>O was subsequently introduced during the relevant stage.

The sequencing results of these controls are displayed in Table S5.1. To estimate the approximate percentage contamination for each sample we compared the number of reads mapped to the human genome obtained from the controls with the number of human reads obtained from the four samples on the same sequencing run, following the methods of (10). The contamination fraction ( $C$ ) for each sample was calculated as :

$$C = (R_b/V_b)/(R_s/V_s)$$

where  $R_b$  represents the number of total human reads in all controls,  $R_s$  the number of human reads for a specific sample,  $V_b$  the total volume of controls added to the pool for loading onto the sequencer and  $V_s$  the sample volume added to the same sequencing pool. The resulting values are shown in Table S5.2. All samples displayed extremely low contamination estimates (<0.16%).

## **S5.2 Patterns of molecular damage and sequence length distribution**

Using mapDamage 2.0 (16) we assessed whether each ancient genome displayed the two main patterns typical of aDNA post-mortem degradation, short sequence length and C to T changes at the 5'-end of molecules (29, 30). Only reads with a minimum mapping quality of 30 were taken into account.

All samples displayed a similar sequence length distribution with a peak observed between 49-51 bp for each sample (Figure S5.1C). This fits with previous observations that ancient samples display average sequence lengths of less than 100bp (31). As samples were sequenced using both 70 bp and 100 bp single-end sequencing peaks at these points could be seen, representing all sequences greater than these lengths that were truncated in their respective sequencing runs.

An increase in C to T and G to A changes towards the 5' and 3' ends of reads was observed in all samples (Figure S5.1A and B). These changes are characteristic of ancient DNA molecules (29). C to T misincorporation frequencies at the 5' end of reads ranged from 14.53% in Rathlin1 to 21.04% in Rathlin2, while complementary G to A frequencies ranged from 11.47% in Rathlin1 to 18.70% in Rathlin2.

## **S5.3 Mitochondrial contamination estimates**

In order to detect the presence of possible modern mitochondrial contamination, the proportion of secondary bases not matching the sample consensus sequence was calculated at both haplogroup defining positions and private sample mutations identified using HAPLOFIND (32) (section S7) as previously described in (10, 33). Bases with a quality below 30 were not considered. The contamination rate was defined as the percentage of the total number of secondary bases across all sample sites considered over the total base count across these positions (%C). Given the influence of sequencing errors, heteroplasmy, NUMTs and post-mortem molecular damage these estimates represent an upper limit of contamination. To address the issue of post-mortem damage this analysis was repeated removing sites where the defining SNP was a G or a C in the sample consensus sequence (%C-MD). Results are shown in Table S5.3. Conservative estimates of mitochondrial contamination ranged from 0.36-0.50%, while when possible molecular damage was also included somewhat higher estimates of 1.02-2.63% were observed, particularly so for Rathlin2 (2.63%), who displayed the highest misincorporation frequencies in the previous section. Due to this confounding effect of postmortem damage, it is the conservative estimate (%C-MD) that is presented in the main paper.

## S5.4 X-chromosome contamination estimates

Sex determination (section S6) of the four Irish samples sequenced revealed the 3 Bronze Age samples to be male. Their haploid state for the X-chromosome allows us to use mismatches to inform about potential contamination. Contamination is expected to be more apparent at sites that are polymorphic within the population compared to neighbouring monomorphic sites due to the increased propensity for allelic diversity at these positions in contaminating individuals. With this in mind, we applied to our data the methods developed in (34) using ANGSD v.0.614 (35), which calculates the rate of heterozygous calls at known polymorphic sites and compares this to the rate at adjacent monomorphic sites. First, we generated a binary count file for the X-chromosome for each sample, taking only into account reads that have mapping quality  $\geq 30$  and bases with a quality  $\geq 20$ . Next, we used the R script “contamination.R” which performs a Fisher’s exact test and jackknife to estimate contamination, delimiting our analysis to unique regions of the X-chromosome (“RES/chrX.unique.gz”) and using known HapMap polymorphic sites (“RES/HapMapChrX.gz”) (<http://popgen.dk/angsd/index.php/Contamination>). ANGSD applies two different methods to estimate the contamination rate, described in reference (34): in Method 1, all major and minor bases are determined for each SNP site and adjacent positions, which are used to estimate background error rates for each sample. Method 1 is more sensitive and has greater precision than Method 2 as it takes all bases into account. However, it assumes that errors between reads and sites are independent. On the other hand, Method 2 is less precise but also less biased because it randomly samples a single read at each site, giving major and minor base counts of either 1 or 0. Major and minor base counts for both methods are displayed in Table S5.4, contingency tables based on these counts are shown in Table S5.5 and contamination estimates based on these results in Table S5.6. Low contamination estimates (below 1.65%) were observed in all three ancient males.

**Figure S5.1. Misincorporation patterns and sequence length distributions for Ballynahatty, Rathlin1, Rathlin2 and Rathlin 3.** (A) and (B) display mismatch frequency relative to the reference genome as a function of read position. (A) Shows the frequency of C to T transitions at the 5' ends of reads while (B) shows the frequency of G to A transitions at the 3' ends of reads. (C) shows the percentage of total reads found for any given read length for each sample.

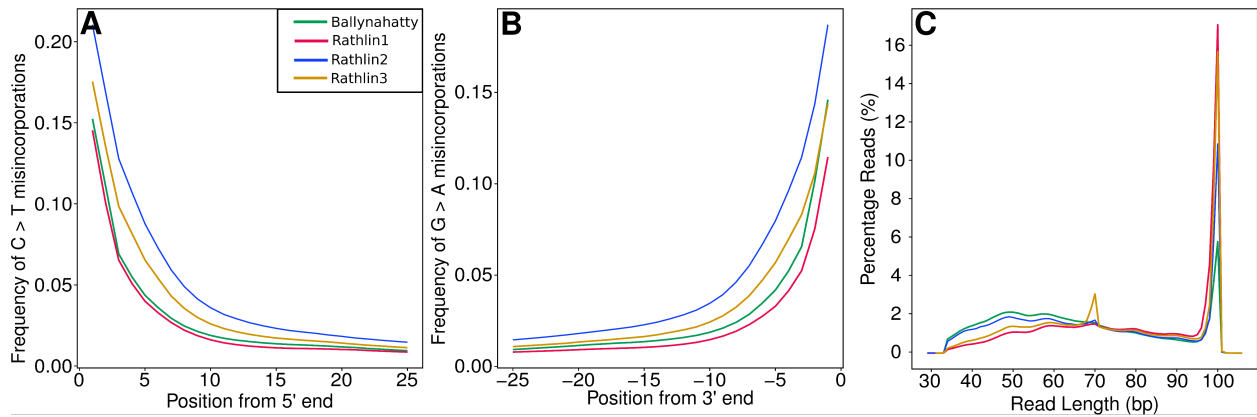



**Table S5.1. Sequenced read numbers for negative controls.**

| <b>Control ID</b>  | <b>Total Reads</b> | <b>Reads mapped to hg19</b> | <b>Reads mapped (mapping quality &gt;30)</b> | <b>Volume added to Sequencing pool (µl)</b> |
|--------------------|--------------------|-----------------------------|----------------------------------------------|---------------------------------------------|
| Air Control        | 4548               | 475                         | 349                                          | 0.33                                        |
| Water Control      | 1782               | 634                         | 519                                          | 0.33                                        |
| Extraction Control | 1207               | 223                         | 176                                          | 0.33                                        |
| <b>Total</b>       | <b>7537</b>        | <b>1332</b>                 | <b>1044</b>                                  | <b>1</b>                                    |

The three controls were sequenced alongside the four ancient samples on an Illumina MiSeq platform (Trinity Genome Sequencing Laboratory, Trinity College Dublin, Ireland) using 70 bp single-end sequencing.

**Table S5.2. Sample contamination estimates based on negative control sequencing results.**

| <b>Sample</b> | <b>Reads mapped to hg19</b> | <b>Volume added to Sequencing pool (<math>\mu</math>l)</b> | <b>Contamination (C)</b> |
|---------------|-----------------------------|------------------------------------------------------------|--------------------------|
| Ballynahatty  | 1610081                     | 1.76                                                       | 0.15%                    |
| Rathlin1      | 847143                      | 0.88                                                       | 0.14%                    |
| Rathlin2      | 800137                      | 0.96                                                       | 0.16%                    |
| Rathlin3      | 1706599                     | 0.90                                                       | 0.07%                    |

Sample mapped reads refer to those obtained from an initial sequencing run on an Illumina MiSeq platform (Trinity Genome Sequencing Laboratory, Trinity College Dublin, Ireland) using 70 bp single-end sequencing that also included the three controls. For each sample the contamination estimate (c) was calculated by comparing the total number of human reads across all controls to the total human reads of each sample, and adjusting for differences in pooling volumes as outlined in S5.1.

**Table S5.3. Mitochondrial contamination estimates.**

| Sample       | Markers used for contamination estimation                                                                                                            | %C    | %C-MD |
|--------------|------------------------------------------------------------------------------------------------------------------------------------------------------|-------|-------|
| Ballynahatty | T14766C, T72C, T16298C, 4769A, 6510A                                                                                                                 | 1.54% | 0.50% |
| Rathlin1     | A11467G, A12308G, G12372A, C16192T, C16270T, T3197C, G9477A, T13617C, A14793G, C16256T, A15218G, A16399G, A15218G, A16399G, A9667G, C16291T, A12582G | 1.02% | 0.36% |
| Rathlin2     | A11467G, A12308G, G12372A, C16270T, T3197C, G9477A, T13617C, C150T, T14182C, C1721T, A13637G, T16189C!, C3212T, G16398A                              | 2.63% | 0.39% |
| Rathlin3     | C295T, T489C A10398G! A12612G, G13708A, C16069T, C150T, T152C!, G15257A, G15812A, C16193T, G10172A, C16278T!, T14819C                                | 1.29% | 0.38% |

%C, represents the upper limit of contamination, while %C-MD is the estimated contamination rate when sites vulnerable to molecular damage are excluded from the calculation. Estimates are derived from the proportion of secondary bases at sample marker sites.

**Table S5.4. Number of major and minor bases detected in SNP sites and adjacent positions in the X-chromosome for ancient male samples.**

| Method   | Sample   | Base       | -4     | -3     | -2     | -1     | SNP site | 1      | 2      | 3      | 4      |
|----------|----------|------------|--------|--------|--------|--------|----------|--------|--------|--------|--------|
| Method 1 | Rathlin1 | minor base | 557    | 539    | 601    | 637    | 1246     | 664    | 537    | 492    | 570    |
|          |          | major base | 286890 | 286715 | 286414 | 286283 | 277489   | 286260 | 286656 | 287069 | 287175 |
|          | Rathlin2 | minor base | 107    | 94     | 113    | 92     | 235      | 125    | 84     | 91     | 96     |
|          |          | major base | 27568  | 27588  | 27569  | 27586  | 27236    | 27605  | 27651  | 27621  | 27601  |
|          | Rathlin3 | minor base | 24     | 21     | 36     | 30     | 45       | 26     | 28     | 14     | 15     |
|          |          | major base | 7992   | 8008   | 7995   | 8000   | 7956     | 7993   | 7988   | 8008   | 7998   |
| Method 2 | Rathlin1 | minor base | 92     | 110    | 91     | 102    | 217      | 106    | 83     | 84     | 99     |
|          |          | major base | 46257  | 46239  | 46258  | 46247  | 46132    | 46243  | 46266  | 46265  | 46250  |
|          | Rathlin2 | minor base | 44     | 35     | 50     | 35     | 92       | 59     | 28     | 40     | 36     |
|          |          | major base | 11274  | 11283  | 11268  | 11283  | 11226    | 11259  | 11290  | 11278  | 11282  |
|          | Rathlin3 | minor base | 11     | 6      | 19     | 18     | 18       | 13     | 13     | 4      | 7      |
|          |          | major base | 3630   | 3635   | 3622   | 3623   | 3623     | 3628   | 3628   | 3637   | 3634   |

Method 1 and Method 2 were performed as in Rasmussen et al., 2011 (34).

**Table S5.5. Contingency table for X-chromosome contamination estimates.**

| Sample   | Base       | Method 1          |                           | Method 2          |                           |
|----------|------------|-------------------|---------------------------|-------------------|---------------------------|
|          |            | Polymorphic Sites | Average of Adjacent Sites | Polymorphic Sites | Average of Adjacent Sites |
| Rathlin1 | major base | 277489            | 286682.75                 | 46132             | 46253.125                 |
|          | minor base | 1246              | 574.625                   | 217               | 95.875                    |
|          | error      | 0.0045            | 0.0020                    | 0.0047            | 0.0021                    |
| Rathlin2 | major base | 27236             | 27598.625                 | 11226             | 11277.125                 |
|          | minor base | 235               | 100.25                    | 92                | 40.875                    |
|          | error      | 0.0086            | 0.0036                    | 0.0082            | 0.0036                    |
| Rathlin3 | major base | 7956              | 7997.75                   | 3623              | 3629.625                  |
|          | minor base | 45                | 24.25                     | 18                | 11.375                    |
|          | error      | 0.0057            | 0.003                     | 0.005             | 0.0031                    |

The number of major and minor bases found in known polymorphic sites in the three ancient male samples and the average number of major and minor bases at adjacent sites 4 bases upstream and downstream of the polymorphism and the observed probability of error (the ratio of minor bases to major bases).

**Table S5.6. X-chromosome based contamination estimates in ancient male samples.**

| <b>Sample</b>   | <b>Contamination (%)</b> | <b>SE</b> | <b>P-value</b> | <b>Contamination (%)</b> | <b>SE</b>  | <b>P-value</b> |
|-----------------|--------------------------|-----------|----------------|--------------------------|------------|----------------|
| <b>Rathlin1</b> | 0.688                    | 0.041     | 2.20E-14       | 0.722                    | 0.09747999 | 2.20E-14       |
| <b>Rathlin2</b> | 1.610                    | 0.230     | 2.20E-16       | 1.646                    | 0.2688079  | 2.17E-10       |
| <b>Rathlin3</b> | 1.014                    | 0.230     | 2.20E-16       | 0.773                    | 0.2688079  | 2.17E-10       |

Associated p-values for contingency tables used in this analysis were calculated using Fisher's exact test.

## S6: Molecular Sex Determination

Osteoarchaeological analysis can provide accurate sex determination of ancient individuals based on differences in the metric dimensions of female and male skeletal anatomy (36, 37). Genetic sex determination can both confirm the findings of these studies and also take their place when an insufficient amount of skeletal material is available or the individual in question is a juvenile. Following the methods of (38) we identified the genetic sex of each ancient Irish human by calculating the ratio of reads aligning to the Y chromosome to reads aligning to both sex chromosomes ( $R_y$ ). Only reads with a mapping quality over 30 were considered. Samples were assigned female if the upper bound of their confidence interval (CI) for  $R_y$  was lower than 0.016, while males required an  $R_y$  CI lower bound of above 0.075. The results (Table S6.1) identified Ballynahatty as female and the three Bronze Age individuals (Rathlin1, Rathlin2 and Rathlin3) as males, corroborating the osteoarchaeological findings.

**Table S6.1. Molecular sex determination for Irish genomes.**

| Sample       | Archaeological Sex | Ry        | CI                          | Genetic Assignment |
|--------------|--------------------|-----------|-----------------------------|--------------------|
| Ballynahatty | Female             | 0.004553  | 0.0045534766 - 0.0045534773 | Female             |
| Rathlin1     | Male               | 0.092273  | 0.0922730811 - 0.092273109  | Male               |
| Rathlin2     | Male               | 0.0923097 | 0.092309641 - 0.0923098134  | Male               |
| Rathlin3     | Male               | 0.094700  | 0.0946998554 - 0.0947002383 | Male               |

The ratio (Ry) denotes the ratio of reads aligning to the Y chromosome to the total number of reads aligning to both sex chromosomes. The 95% confidence interval (CI) was computed as  $Ry \pm 1.96 \times Ry \times (1 - Ry)/(N_x + N_y)$ , where  $N_x$  and  $N_y$  are the total number of reads aligning to the X chromosome and Y chromosome respectively. Only reads with a mapping quality above 30 were considered.



## S7: Mitochondrial Genome Analysis

The mitochondrial coverage of each sample was obtained using the DepthOfCoverage tool in GenomeAnalysisTK v2.4-7 (15). To determine sample haplogroups we called consensus mitochondrial genome sequences using Samtools mpileup (with parameters -B and -Q 30) and vcfutils.pl (vcf2fq) (14) as in (19). HaploFind (32) was used to identify defining mutations and assign sample haplogroups. Only positions with a coverage of 6X or over were taken into account. Results are displayed in Table S7.1.

The Neolithic individual, Ballynahatty, was found to have all the defining mutations of haplogroup HV0 with the additional downstream T195C! mutation on the branch leading to haplogroups HV0b-HV0f. Haplogroup HV has been previously identified in ancient European individuals with highest frequencies seen in Early and Middle Neolithic groups from Germany and France (25, 39, 40). The haplogroup has also been described in hunter-gatherers from the Pitted Ware culture of southern Scandinavia (41, 42). The haplogroup has not to date been identified in any Mesolithic Europeans.

Two of the three Bronze age individuals, Rathlin1 and Rathlin2, belong to the haplogroup U5, which has been consistently observed as one of the dominant maternal lineages of European hunter-gatherer groups (21, 33, 43–46). Rathlin1 belongs to the haplogroup U5a1b1e, while Rathlin2 is a member of U5b2a2. The coalescence time estimate for the U5 haplogroup is approximately 25-30 thousand years as calculated by (47), with age estimates of 16-20 thousand years and 20-24 thousand years for the subhaplogroups U5a and U5b respectively. Haplogroup U5 is found at a frequency of 9% in modern day Europeans (48) with peaks seen in the Basque Country (49) and Scandinavia (50). The U5 haplogroup's age and distribution suggest its presence in Paleolithic Europe with a later expansion of its subclades from southern refugia after the Last Glacial Maximum (47). The U haplogroup shows an increase in frequency in ancient samples between the Early and Middle Neolithic, with another surge in frequency occurring in the Late Neolithic (25). These changes are thought to represent a resurgence of hunter gatherer lineages in the Middle Neolithic and an influx of steppe groups into Europe in the Late Neolithic and Bronze Ages (25).

The third Bronze Age individual, Rathlin3, is a member of haplogroup J2b1a. Haplogroup J is found at highest frequencies in the Middle East (13%), with a somewhat even frequency distribution across Europe (8.8%; refs. 48, 51). It is suggested that haplogroup J initially diversified in the Middle East where the majority of its subclades are distributed. Approximately 20% of J lineages belong to haplogroup J2, which

dates to approximately 37,000 years before present (51). While haplogroup J2 is predominantly Middle Eastern, the subclade J2b1 is found in Europe with highest frequencies seen in the Mediterranean-central and Atlantic regions. Our sample's haplogroup, J2b1a, is found almost exclusively in Europe and dates to approximately 11,000 years before present (51). As is the case with haplogroup HV, haplogroup J has been found in numerous ancient individuals, with highest frequencies seen in Early and Middle Neolithic groups (25, 39), suggesting its dispersal into Europe with agricultural populations.

**Table S7.1. Mitochondrial haplogroup assignment and coverage for ancient Irish individuals.**

| Sample       | Coverage (X) | Haplogroup | Defining haplogroup markers absent in sample haplotype | Sample mutations not associated with assigned haplogroup | Assignment Score | Haplo Score |
|--------------|--------------|------------|--------------------------------------------------------|----------------------------------------------------------|------------------|-------------|
| Ballynahatty | 246.09       | HV0+195    | <b>7521G</b>                                           | 4769A, 6510A, 16519T                                     | 0.95             | 1           |
| Rathlin1     | 342.48       | U5a1b1e    | -                                                      | 16519T                                                   | 1                | 1           |
| Rathlin2     | 103.68       | U5b2a2     | <b>4732G, 7521G, 7768G, 16192T*</b>                    | 16519T, 16192insC                                        | 0.86             | 1           |
| Rathlin3     | 64.88        | J2b1a      | <b>4216C, 5633T, 7146A, 7476T, 7521G</b>               | 14819C, 16519T                                           | 0.83             | 1           |

Absent haplogroup mutations marked in bold lacked sufficient sample coverage at these positions. The absent haplogroup mutation marked with an asterisk (\*) was displaced by a private insertion in this sample.

## S8: Y Chromosome Analysis

Three of the four ancient genomes were identified as genetically male (section S6). To determine the Y-chromosome haplogroup for each individual we assessed their allelic state at each SNP in the ISOGG database of Y chromosomal markers, omitting SNPs marked as under investigation. We also removed C/G and A/T SNPs lacking dbSNP information to avoid strand assignment errors.

The Pileup tool in GATK v2.4 (15) was used to report the base calls for all reads covering each site. Both a minimum base and mapping quality of 30 was required for consideration. Heterozygous sites were removed, possibly representing contamination, deamination or misalignment. The only exception to this were sites where the observed heterozygosity was explainable as deamination and the SNP in question was not a transition.

All samples could be securely assigned to haplogroup R1b1a2. This result was based on the presence of fourteen defining haplogroup mutations in Rathlin1, ten in Rathlin2 and four in Rathlin3 (Table S8.1), with an average coverage per informative SNP of 5.5X, 1.6X and 1.25X respectively. Moreover, all samples contained the derived allele at marker M529, the defining mutation of R1b1a2a1a2c, strongly suggesting their membership of this haplogroup. This marker was present at 4X coverage in Rathlin1, 1X coverage in Rathlin2 and 2X coverage in Rathlin3.

Rathlin1 could be further placed into the subhaplogroup R1b1a2a1a2c1g where the defining marker was present a 3X coverage. Rathlin2 also displayed the same C>T marker mutation, however the low sample coverage at this position (1X) prevented us from excluding deamination as a possible cause of the observation. Therefore, the final assigned haplogroup of Rathlin2 was R1b1a2a1a2c1 based on the presence of the A>C subhaplogroup mutation at 2X coverage.

All 3 Rathlin Bronze Age samples sequenced in the present study belong to the M529 lineage which is characterized by higher frequencies in the British Isles, reaching peak frequencies (> 94%) in the West of Ireland (52, 53).

One particular subclade of M529, defined by the mutation M222 (52), has a distribution which in the present day is considerably restricted to Ireland. Rathlin1, however, the only sample with reads covering SNP M222, presents the ancestral allele at this position.

**Table S8.1. Defining Y chromosome haplogroup mutations for three Bronze Age male samples.**

| Haplogroup | Marker | SNP ID     | Position in hg19/GRCh37 | Ancestral Allele (fwd) | Derived Allele (fwd) | Rathlin1 Allele | Rathlin2 Allele | Rathlin3 Allele |
|------------|--------|------------|-------------------------|------------------------|----------------------|-----------------|-----------------|-----------------|
| R          | M207   | rs2032658  | 15581983                | A                      | G                    | <b>G</b>        | <b>G</b>        | -               |
| R          | P224   | rs17307398 | 17285993                | C                      | T                    | <b>T</b>        | -               | <b>T*</b>       |
| R          | P227   | rs4481791  | 21409706                | G                      | C                    | <b>C</b>        | <b>C</b>        | -               |
| R          | P232   | rs9786261  | 23035132                | G                      | A                    | <b>A</b>        | <b>A*</b>       | <b>A*</b>       |
| R          | P280   | rs891407   | 21843090                | C                      | G                    | <b>G</b>        | <b>G</b>        | -               |
| R          | P285   | rs17249974 | 19267344                | C                      | A                    | <b>A</b>        | -               | -               |
| R          | PF6014 | rs1865680  | 6868118                 | G                      | A                    | <b>A</b>        | -               | -               |
| R          | M734   | rs1348733  | 18066156                | C                      | T                    | <b>T</b>        | <b>T*</b>       | <b>T*</b>       |
| R1         | P294   | rs1005041  | 7570822                 | G                      | C                    | <b>C</b>        | <b>C</b>        | -               |
| R1         | P242   | rs7067478  | 7647357                 | G                      | A                    | <b>A*</b>       | -               | <b>A*</b>       |
| R1         | P238   | rs9785717  | 7771131                 | G                      | A                    | <b>A</b>        | <b>A*</b>       | -               |
| R1         | P245   | rs3853052  | 8633545                 | T                      | C                    | <b>C</b>        | -               | -               |
| R1         | P231   | rs9786465  | 9989615                 | A                      | G                    | -               | <b>G</b>        | <b>G</b>        |
| R1         | M173   | rs2032624  | 15026424                | T                      | C                    | <b>C</b>        | -               | <b>T*</b>       |
| R1         | P225   | rs17307070 | 15590342                | G                      | T                    | <b>T</b>        | -               | -               |
| R1         | P286   | rs1118473  | 17716251                | C                      | T                    | <b>T</b>        | <b>T*</b>       | <b>T*</b>       |
| R1         | P236   | rs9785959  | 17782178                | C                      | G                    | <b>G</b>        | -               | <b>G</b>        |
| R1         | P234   | rs9786197  | 21117888                | T                      | C                    | <b>C</b>        | <b>C</b>        | -               |
| R1         | P233   | rs9786232  | 21166358                | T                      | G                    | <b>G</b>        | -               | -               |
| R1         | M306   | rs1558843  | 22750583                | C                      | A                    | <b>A</b>        | -               | <b>A</b>        |
| R1b        | M343   | rs9786184  | 2887824                 | C                      | A                    | <b>A</b>        | -               | <b>A</b>        |
| R1b1       | M415   | rs9786194  | 9170545                 | C                      | A                    | <b>A</b>        | -               | <b>A</b>        |
| R1b1       | L278   | rs17249854 | 18914441                | C                      | T                    | <b>T</b>        | -               | -               |
| R1b1a      | P297   | rs9785702  | 18656508                | G                      | C                    | <b>C</b>        | <b>C</b>        | <b>C</b>        |
| R1b1a2     | M269   | rs9786153  | 22739367                | T                      | C                    | <b>C</b>        | <b>C</b>        | -               |
| R1b1a2     | PF6399 | rs2058276  | 2668456                 | C                      | T                    | <b>T</b>        | -               | -               |
| R1b1a2     | M520   | rs9786486  | 4446430                 | T                      | A                    | -               | <b>A</b>        | <b>A</b>        |
| R1b1a2     | L265   | rs9786882  | 8149348                 | A                      | G                    | <b>G</b>        | <b>G</b>        | -               |
| R1b1a2     | PF6475 | rs66915044 | 17986687                | C                      | A                    | <b>A</b>        | -               | -               |
| R1b1a2     | L1063  | rs9786876  | 18167403                | C                      | T                    | <b>T</b>        | <b>T*</b>       | <b>T*</b>       |

|                 |          |             |          |   |   |    |    |    |
|-----------------|----------|-------------|----------|---|---|----|----|----|
| R1b1a2          | PF6485   | rs877756    | 18719565 | T | C | C  | C  | -  |
| R1b1a2          | L407     | -           | 13887941 | G | A | A  | A  | -  |
| R1b1a2          | L478     | -           | 3274923  | A | C | C  | -  | -  |
| R1b1a2          | L482     | -           | 7863189  | G | A | A  | A* | -  |
| R1b1a2          | L483     | -           | 8233186  | C | T | T  | T* | T* |
| R1b1a2          | L500     | -           | 18180446 | C | A | A  | A  | -  |
| R1b1a2          | L773     | -           | 7220727  | A | G | G  | -  | -  |
| R1b1a2          | L1353    | -           | 19179540 | G | A | A  | -  | A* |
| R1b1a2          | L150.1   | rs9785831   | 10008791 | C | T | T  | T  | -  |
| R1b1a2a         | L49.1    | rs9786142   | 2842212  | T | A | A  | -  | -  |
| R1b1a2a         | L23      | rs9785971   | 6753511  | G | A | A  | A* | A* |
| R1b1a2a1        | M412     | rs9786140   | 8502236  | G | A | A  | -  | A* |
| R1b1a2a1a       | L52      | rs13304168  | 14641193 | C | T | T  | T* |    |
| R1b1a2a1a       | L151     | rs2082033   | 16492547 | C | T | T* | -  | -  |
| R1b1a2a1a       | P311     | rs9785659   | 18248698 | A | G | -  | -  | -  |
| R1b1a2a1a       | P310     | rs9786283   | 18907236 | A | C | C  | -  | -  |
| R1b1a2a1a2      | P312     | rs34276300  | 22157311 | C | A | A  | -  | -  |
| R1b1a2a1a2c     | M529     | rs11799226  | 15654428 | C | G | G  | G  | G  |
| R1b1a2a1a2c     | L459     | rs141984805 | 5275051  | C | G | G  | -  | -  |
| R1b1a2a1a2c     | S461     | rs146019383 | 28632468 | G | C | C  | -  | -  |
| R1b1a2a1a2c1    | S521     | -           | 2836431  | A | C | C  | C  | -  |
| R1b1a2a1a2c1    | Z2542    | rs138975640 | 17885577 | C | T | T* | -  | -  |
| R1b1a2a1a2c1a   | S474     | -           | 22735599 | G | A | G  | G  | -  |
| R1b1a2a1a2c1b   | S5196    | -           | 16250226 | T | C | T  | -  | -  |
| R1b1a2a1a2c1b   | L513     | -           | 7340450  | C | T | C  | -  | C  |
| R1b1a2a1a2c1b   | S279     | -           | 5818205  | T | C | T* | -  | -  |
| R1b1a2a1a2c1c   | FGC11134 | -           | 21383466 | T | A | T  | -  | T  |
| R1b1a2a1a2c1d   | S3666    | rs11799049  | 14048611 | A | G | A  | -  | -  |
| R1b1a2a1a2c1e   | S219     | -           | 15702775 | T | C | T  | T* | -  |
| R1b1a2a1a2c1f   | S218     | -           | 7193034  | G | A | G  | G  | -  |
| R1b1a2a1a2c1g   | S192     | rs138322855 | 9878915  | C | T | T  | T* | -  |
| R1b1a2a1a2c1g1  | FGC3213  | -           | 26722140 | A | C | -  | -  | -  |
| R1b1a2a1a2c1g1a | P314.2   | -           | 2888672  | T | C | T  | T* | -  |

|                    |         |         |          |   |   |   |    |    |
|--------------------|---------|---------|----------|---|---|---|----|----|
| R1b1a2a1a2c1g1b    | S3058   | -       | 15683936 | T | C | T | T* | -  |
| R1b1a2a1a2c1g2a    | s280    | -       | 7061380  | T | G | T | T  | T  |
| R1b1a2a1a2c1g3     | S5488   | -       | 19088630 | C | T | C | T* | -  |
| R1b1a2a1a2c1g3b    | Z16294  | -       | 21649408 | G | A | G | -  | G  |
| R1b1a2a1a2c1g3c    | L1336   | -       | 19372904 | T | C | T | -  | T* |
| R1b1a2a1a2c1g5     | L130    | -       | 6753503  | G | A | G | G  | G  |
| R1b1a2a1a2c1h      | L371    | -       | 18656470 | T | G | T | T  | T  |
| R1b1a2a1a2c1i      | S836    | -       | 14331384 | C | T | - | C  | C  |
| R1b1a2a1a2c1i      | S524    | -       | 16992602 | T | C | T | -  | -  |
| R1b1a2a1a2c1j      | S470    | -       | 8736334  | G | A | G | G  | -  |
| R1b1a2a1a2c1k      | L1335   | -       | 23154201 | A | G | A | A* | -  |
| R1b1a2a1a2c1l      | S7200   | -       | 21753900 | C | A | C | C  | C  |
| R1b1a2a1a2c1l      | FGC5494 | -       | 3445114  | A | G | - | -  | -  |
| R1b1a2a1a2c1m      | S16264  | -       | 14658766 | A | G | A | A* | A* |
| R1b1a2a1a2c1m      | S21225  | -       | 18731825 | A | G | A | -  | -  |
| R1b1a2a1a2c1n      | Y5305   | -       | 17681656 | C | T | C | -  | -  |
| R1b1a2a1a2c1a1a1a1 | M222    | rs20321 | 14902414 | G | A | G | -  | -  |

Sample alleles were determined with the Pileup tool in GATK v2.4 (15). A minimum base and mapping quality of 30 and was required for consideration. Sample alleles in bold font match the derived allele of the given marker. Samples alleles marked with an asterisk (\*) represent a possible deamination event, where the defining mutation is a C>T or G>A and sample coverage at this site is below 3X.

## S9: Genotype calling and merging with modern datasets

### S9.1 Human Origins Dataset

In order to analyse our whole genome data in combination with the ancient genotype data published in (25), the publicly available modern genotype dataset used in this study was downloaded, covering 354,212 SNPS overlapping with the Affymetrix Human Origins array and consisting of 1946 present-day humans from 167 populations initially published in (21).

The vast majority of published ancient genomes to date possess sequencing coverage too low for accurate diploid genotype calling. To circumvent this issue the pileup tool in GATK v2.4 (15) was used to report sample base calls for each position in the Human Origins dataset for 33 ancient samples from (10, 18–21, 26–28) (data processing detailed in section S4.2) and the four Irish individuals. Bases needed a minimum quality of 30 to be considered and sites with three or more different bases present were removed. A single base call was then picked at random from each site and duplicated to create a diploid homozygous genotype at that position for that individual. Creating genotype calls in this manner has the effect of increasing the appearance of drift artificially on the lineage specific to the individual but this drift should not occur in any particular direction and should not affect inferences about relationships between individuals. This strategy was used for all ancient genomes regardless of coverage to avoid any possible bias it may introduce compared to other genotype calling procedures.

Using PLINK v1.90 (54), we merged our genotype calls from both the Irish and published whole genome data (10, 18–21, 26–28) with the modern Human Origins dataset and the genotypes of 38 ancient individuals published in (25) as well as genotypes for three Pleistocene hunter gatherers obtained from (25) but sequenced in separate studies (22–24). In cases where the allele of an ancient individual matched neither of the alleles given in the Human Origins dataset, we removed this position in the ancient sample. Approximately 250 of these mismatches occurred in each sample and are most likely the result of strand assignment errors, postmortem damage or sequencing error.

The final merged dataset was used for principal component analysis (section S10), ADMIXTURE analysis (section S11) as well as D- and f-statistics (section S12). Information on the above 82 ancient samples, including number of confident SNP calls for positions in the Human Origins array, is displayed in Table S9.1.



## **S9.2 Hellenthal et al. 2014 Dataset**

The four Irish genomes and 43 whole ancient genomes (10, 18–21, 26–28) could also be studied in relation to a second modern SNP dataset based on samples from (55–58) genotyped using the Illumina 660W array in (59). This consists of a total of 474,491 analyzed autosomal SNPs in 1530 individuals from 95 different populations, including Ireland. SNP positions were mapped to build 37 (GRCh37) of the human genome and we excluded genotypes with a minor allele frequency below 0.5% and a genotyping rate below 99% across all samples.

Homozygous diploid genotypes were called for 43 previously published ancient genomes (10, 18–21, 26–28) as well as the four ancient Irish genomes for each position in the Hellenthal dataset as described in section S9.1. Included were six samples (not detailed in table S9.1) from (26), which did not have a sufficient number of genotype calls from the Human Origins dataset to be considered for the main analyses, but did meet the quota required for analysis with the Hellenthal dataset.

The genotype calls for all ancient individuals were subsequently merged with the modern dataset using PLINK v1.90 (54), again as described in S9.1. This final merged dataset was used for principal component analysis (Figure S10.2).

A second dataset used in CHROMOPAINTER analysis (Main Paper, Fig. 3) was created for analysis consisting of only high coverage European ancient genomes above 10X and the modern Hellenthal dataset. Diploid genotype calls were generated for the six high coverage samples (Stuttgart, Loschbour, BR2, NE1, Ballynahatty and Rathlin1), using the UnifiedGenotyper tool in GATK v2.4-7 (15). Only bases with a quality above 30 were considered for calling (-mbq 30). Genotype calls were filtered for a depth of coverage of 10X or above and a genotype quality of 30 or above. The six samples were then merged individually with the modern dataset using PLINK v1.90 (54). In cases where either allele of an ancient individual matched neither of the alleles given in the Hellenthal 2014 dataset, this position was removed from the ancient sample. This problem only occurred at two SNPs in the dataset which are reported as triallelic in dbSNP. Number of confident diploid calls for each sample is reported in Table S14.1.

### **S9.3 1000 Genomes Phase 3 v5 and Simons Genome Diversity Project Datasets**

To analyse runs of homozygosity (ROH) for the six high coverage ancient European samples (Stuttgart, Loschbour, BR2, NE1, Ballynahatty and Rathlin1) (section S13), diploid genotypes were called for autosomal transversion SNPs from the Phase 3 v5 1000 Genomes release (60) using the UnifiedGenotyper tool in GATK v2.4-7 (15) as described in the final paragraph of section S9.2. This variant set allows for the high SNP density required for this type of analysis, while removing the complication of postmortem deamination. Sample genotype calls were subsequently merged with the same set of transversion SNPs from 2504 individuals of the Phase 3 v5 1000 Genomes release (60) and 23 individuals from the Simons Genome Diversity Project (61) using PLINK v1.90 (54), again as in S9.2. Only SNPs genotyped across all ancient individuals with a minor allele frequency above 0.5% were retained. This left 1,601,314 transversion SNPs for ROH analysis.

**Table S9.1. Sample IDs, information and SNPS counts for all ancient samples used in study.**

| Reference                    | Original Sample ID | Current Study ID | Country of Origin | Population Grouping (D- and f- Statistics) | Context          | Human Origins SNP calls |
|------------------------------|--------------------|------------------|-------------------|--------------------------------------------|------------------|-------------------------|
| Seguin-Orlando et al. (2014) | K14                | Kostenki14       | Russia            | N/A                                        | Hunter Gatherer  | 328898                  |
| Raghavan et al. (2014)       | MA-1               | MA1              | Russia            | N/A                                        | Hunter Gatherer  | 250517                  |
| Fu et al. (2014)             | Ust'-Ishim         | Ust_Ishim        | Russia            | N/A                                        | Hunter Gatherer  | 268641                  |
| Haak et al. (2015)           | I0061              | Karelia_HG       | Russia            | Eastern_HG (EHG)                           | Hunter Gatherer  | 337770                  |
| Haak et al. (2015)           | I0124              | Samara_HG        | Russia            | Eastern_HG (EHG)                           | Hunter Gatherer  | 204440                  |
| Gamba et al. (2014)          | KO1                | KO1              | Hungary           | Western_HG (WHG)                           | Hunter Gatherer  | 238503                  |
| Olalde et al. (2014)         | La Braña 1         | LaBrana          | Spain             | Western_HG (WHG)                           | Hunter Gatherer  | 331277                  |
| Lazaridis et al. (2014)      | Loschbour          | Loschbour        | Luxembourg        | Western_HG (WHG)                           | Hunter Gatherer  | 353217                  |
| Haak et al. (2015)           | I0011              | Motala_HG1       | Sweden            | Scandinavian_HG (SHG)                      | Hunter Gatherer  | 225724                  |
| Haak et al. (2015)           | I0012              | Motala_HG2       | Sweden            | Scandinavian_HG (SHG)                      | Hunter Gatherer  | 289609                  |
| Haak et al. (2015)           | I0013              | Motala_HG3       | Sweden            | Scandinavian_HG (SHG)                      | Hunter Gatherer  | 248337                  |
| Haak et al. (2015)           | I0014              | Motala_HG4       | Sweden            | Scandinavian_HG (SHG)                      | Hunter Gatherer  | 307860                  |
| Haak et al. (2015)           | I0015              | Motala_HG5       | Sweden            | Scandinavian_HG (SHG)                      | Hunter Gatherer  | 282120                  |
| Haak et al. (2015)           | I0016              | Motala_HG6       | Sweden            | Scandinavian_HG (SHG)                      | Hunter Gatherer  | 272163                  |
| Lazaridis et al. (2014)      | Motala12           | Motala12         | Sweden            | Scandinavian_HG (SHG)                      | Hunter Gatherer  | 317396                  |
| Skoglund et al. (2014)       | Ajvide58           | Ajv58            | Sweden            | N/A                                        | Hunter Gatherer  | 310980                  |
| Gamba et al. (2014)          | NE1                | Hungarian_EN1    | Hungary           | Hungarian_EN                               | Early Neolithic  | 352352                  |
| Gamba et al. (2014)          | NE5                | Hungarian_EN5    | Hungary           | Hungarian_EN                               | Early Neolithic  | 197914                  |
| Gamba et al. (2014)          | NE6                | Hungarian_EN6    | Hungary           | Hungarian_EN                               | Early Neolithic  | 227018                  |
| Gamba et al. (2014)          | NE7                | Hungarian_EN7    | Hungary           | Hungarian_EN                               | Early Neolithic  | 220144                  |
| Haak et al. (2015)           | I0025              | LBK_EN1          | Germany           | LBK_EN                                     | Early Neolithic  | 304262                  |
| Haak et al. (2015)           | I0026              | LBK_EN2          | Germany           | LBK_EN                                     | Early Neolithic  | 311990                  |
| Haak et al. (2015)           | I0046              | LBK_EN3          | Germany           | LBK_EN                                     | Early Neolithic  | 263814                  |
| Haak et al. (2015)           | I0054              | LBK_EN4          | Germany           | LBK_EN                                     | Early Neolithic  | 333922                  |
| Haak et al. (2015)           | I0100              | LBK_EN5          | Germany           | LBK_EN                                     | Early Neolithic  | 338572                  |
| Lazaridis et al. (2014)      | Stuttgart          | Stuttgart        | Germany           | N/A                                        | Early Neolithic  | 353142                  |
| Haak et al. (2015)           | I0410              | Spanish_EN1      | Spain             | Spanish_EN                                 | Early Neolithic  | 294296                  |
| Haak et al. (2015)           | I0412              | Spanish_EN2      | Spain             | Spanish_EN                                 | Early Neolithic  | 330260                  |
| Haak et al. (2015)           | I0413              | Spanish_EN3      | Spain             | Spanish_EN                                 | Early Neolithic  | 292545                  |
| Olalde et al. (2015)         | CB13               | Cardial_EN       | Spain             | N/A                                        | Early Neolithic  | 215014                  |
| Current Study                | Ballynahatty       | Ballynahatty     | Ireland           | N/A                                        | Middle Neolithic | 353009                  |
| Skoglund et al. (2014)       | Gokhem2            | Gok2             | Sweden            | N/A                                        | Middle Neolithic | 234743                  |

|                         |            |                         |                |                        |                  |        |
|-------------------------|------------|-------------------------|----------------|------------------------|------------------|--------|
| Haak et al. (2015)      | I0172      | Esperstedt_MN           | Germany        | N/A                    | Middle Neolithic | 276090 |
| Haak et al. (2015)      | I0406      | Spanish_MN1             | Spain          | Spanish_MN             | Middle Neolithic | 320571 |
| Haak et al. (2015)      | I0407      | Spanish_MN2             | Spain          | Spanish_MN             | Middle Neolithic | 233600 |
| Haak et al. (2015)      | I0408      | Spanish_MN3             | Spain          | Spanish_MN             | Middle Neolithic | 318206 |
| Haak et al. (2015)      | I0108      | Bell_Beaker_LN1         | Germany        | Bell_Beaker            | Late Neolithic   | 257629 |
| Haak et al. (2015)      | I0111      | Bell_Beaker_LN2         | Germany        | Bell_Beaker            | Late Neolithic   | 205899 |
| Haak et al. (2015)      | I0112      | Bell_Beaker_LN3         | Germany        | Bell_Beaker            | Late Neolithic   | 337239 |
| Allentoft et al. (2015) | RISE569    | Bell_Beaker_Czech       | Czech Republic | Bell_Beaker            | Late Neolithic   | 205056 |
| Haak et al. (2015)      | I0058      | BenzigerodeHeimburg_LN1 | Germany        | BenzigerodeHeimburg_LN | Late Neolithic   | 243960 |
| Haak et al. (2015)      | I0059      | BenzigerodeHeimburg_LN2 | Germany        | BenzigerodeHeimburg_LN | Late Neolithic   | 238399 |
| Haak et al. (2015)      | I0103      | Corded_Ware_LN1         | Germany        | Corded_Ware_LN         | Late Neolithic   | 333213 |
| Haak et al. (2015)      | I0104      | Corded_Ware_LN2         | Germany        | Corded_Ware_LN         | Late Neolithic   | 332923 |
| Haak et al. (2015)      | I0118      | Alberstedt_LN           | Germany        | N/A                    | Late Neolithic   | 346109 |
| Allentoft et al. (2015) | RISE98     | Nordic_LN               | Sweden         | N/A                    | Late Neolithic   | 337905 |
| Günther et al.(2015)    | ATP12-1420 | Spanish_CA1             | Spain          | Spanish_CA             | Copper Age       | 268393 |
| Günther et al. (2015)   | ATP16      | Spanish_CA2             | Spain          | Spanish_CA             | Copper Age       | 246480 |
| Günther et al. (2015)   | ATP2       | Spanish_CA3             | Spain          | Spanish_CA             | Copper Age       | 346793 |
| Gamba et al. (2014)     | CO1        | CO1                     | Hungary        | N/A                    | Copper Age       | 208581 |
| Keller et al. (2012)    | Iceman     | Oetzi                   | Italy          | N/A                    | Copper Age       | 345457 |
| Haak et al. (2015)      | I0231      | Yamnaya1                | Russia         | Yamnaya                | Copper Age       | 344303 |
| Haak et al. (2015)      | I0429      | Yamnaya2                | Russia         | Yamnaya                | Copper Age       | 215252 |
| Haak et al. (2015)      | I0438      | Yamnaya3                | Russia         | Yamnaya                | Copper Age       | 211116 |
| Haak et al. (2015)      | I0443      | Yamnaya4                | Russia         | Yamnaya                | Copper Age       | 340077 |
| Allentoft et al. (2015) | RISE548    | Yamnaya5                | Russia         | Yamnaya                | Copper Age       | 220410 |
| Allentoft et al. (2015) | RISE552    | Yamnaya6                | Russia         | Yamnaya                | Copper Age       | 290485 |
| Allentoft et al. (2015) | RISE500    | Andronovo1              | Russia         | Andronovo              | Early Bronze     | 237751 |
| Allentoft et al. (2015) | RISE505    | Andronovo2              | Russia         | Andronovo              | Early Bronze     | 341839 |
| Gamba et al. (2014)     | BR1        | BR1                     | Hungary        | Hungarian_Bronze       | Early Bronze     | 171932 |
| Allentoft et al. (2015) | RISE479    | Vatya                   | Hungary        | Hungarian_Bronze       | Early Bronze     | 264115 |
| Current Study           | Rathlin1   | Rathlin1                | Ireland        | Irish_Bronze           | Early Bronze     | 353333 |
| Current Study           | Rathlin2   | Rathlin2                | Ireland        | Irish_Bronze           | Early Bronze     | 284047 |
| Current Study           | Rathlin3   | Rathlin3                | Ireland        | Irish_Bronze           | Early Bronze     | 202893 |
| Allentoft et al. (2015) | RISE395    | Sintashta1              | Russia         | N/A                    | Early Bronze     | 275743 |
| Allentoft et al. (2015) | RISE511    | Afanasievo1             | Russia         | N/A                    | Early Bronze     | 327954 |
| Haak et al. (2015)      | I0047      | Unetice_EBA1            | Germany        | Unetice                | Early Bronze     | 285142 |

|                         |         |                      |                |                  |              |        |
|-------------------------|---------|----------------------|----------------|------------------|--------------|--------|
| Haak et al. (2015)      | I0114   | Unetice_EBA_relative | Germany        | Unetice          | Early Bronze | 214641 |
| Haak et al. (2015)      | I0116   | Unetice_EBA2         | Germany        | Unetice          | Early Bronze | 304713 |
| Haak et al. (2015)      | I0117   | Unetice_EBA3         | Germany        | Unetice          | Early Bronze | 276893 |
| Haak et al. (2015)      | I0164   | Unetice_EBA4         | Germany        | Unetice          | Early Bronze | 329147 |
| Allentoft et al. (2015) | RISE150 | Unetice_Poland       | Poland         | Unetice          | Early Bronze | 205990 |
| Allentoft et al. (2015) | RISE577 | Unetice_Czech        | Czech Republic | Unetice          | Early Bronze | 212153 |
| Gamba et al. (2014)     | BR2     | BR2                  | Hungary        | Hungarian_Bronze | Late Bronze  | 352215 |
| Allentoft et al. (2015) | RISE493 | Karasuk1             | Russia         | Karasuk          | Late Bronze  | 345106 |
| Allentoft et al. (2015) | RISE495 | Karasuk2             | Russia         | Karasuk          | Late Bronze  | 341164 |
| Allentoft et al. (2015) | RISE496 | Karasuk3             | Russia         | Karasuk          | Late Bronze  | 294150 |
| Allentoft et al. (2015) | RISE497 | Karasuk4             | Russia         | Karasuk          | Late Bronze  | 350147 |
| Allentoft et al. (2015) | RISE499 | Karasuk5             | Russia         | Karasuk          | Late Bronze  | 240623 |
| Allentoft et al. (2015) | RISE502 | Karasuk6             | Russia         | Karasuk          | Late Bronze  | 240991 |
| Haak et al. (2015)      | I0099   | Halberstadt_LBA      | Germany        | N/A              | Late Bronze  | 333815 |
| Allentoft et al. (2015) | RISE523 | Mezhovskaya1         | Russia         | N/A              | Late Bronze  | 306507 |

Samples are ordered by chronological context.

## S10: Principal Component Analysis

To investigate the genetic affinities of our Irish genomes in the context of modern and ancient Eurasian populations we performed two principal component analyses (PCAs). The methods used to call sample genotypes and merge them with them with modern data is outlined in the previous section S9.

We used smartpca version 10210 from EIGENSOFT (62, 63) to carry out PCA on an extracted subset of 677 individuals from 54 West Eurasian populations (Table S10.1) from the modern Human Origins dataset (21) using a set of 354212 SNPs from the Human Origins array (21), with 82 ancient genomes, including the four Irish samples, projected onto the modern variation (lsqproject: YES option). The results are displayed in Fig.1*A* and *B* of the main paper. Figure S10.1 shows the same PCA with modern individuals alone, labeled with the first three letters of the population to which they belong.

PCA was also performed on 43 ancient individuals from (10, 18–21, 26–28) and the four Irish individuals, merged with the Hellenthal 2014 (59) dataset (Section S9.2). We carried out the PCA on a set of 472565 SNPs from a subset of 681 modern Eurasians from 41 populations (Table S10.1) and projected ancient individuals onto the modern variation as described above. The results are shown in Figure S10.2.

Comparing the results from both PCAs, based on genotypes from different SNP arrays and different individuals, we can determine that our findings are not the product of unseen bias in our dataset but in fact truly representative of patterns in Eurasian genetic variation, both modern and ancient.

**Figure S10.1. Principal component plot of 677 West Eurasians from the modern Human Origins dataset.** Individuals are labeled by the first three letters of their population grouping, listed in Table S10.1. Individuals are coloured by geographical region.

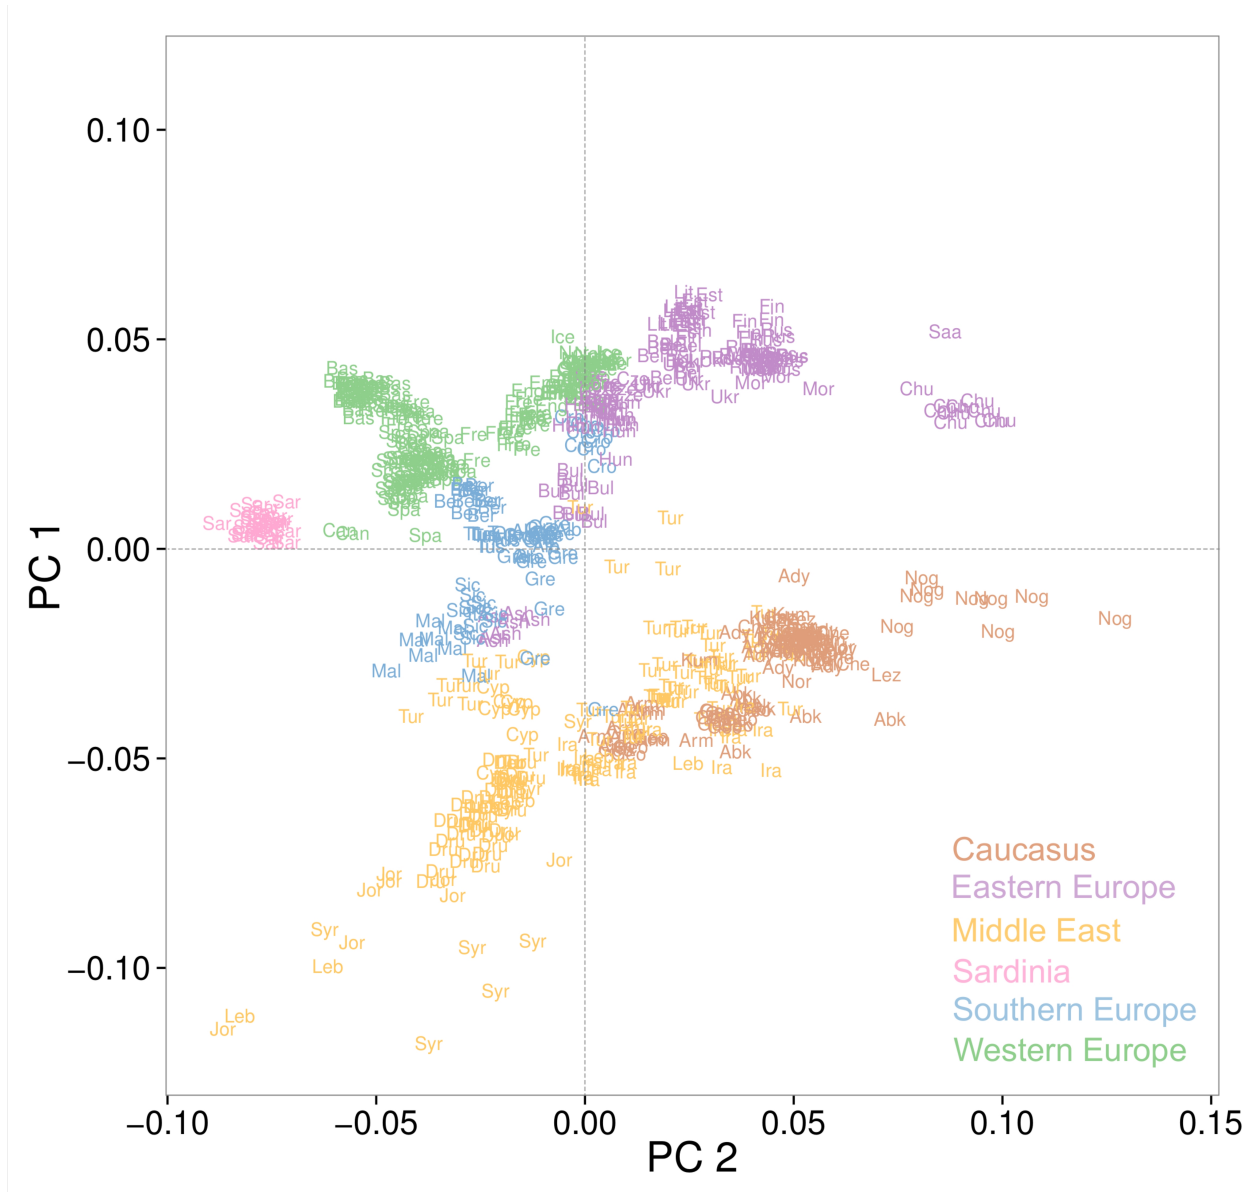

**Figure S10.2. Principal component plot of 681 modern West Eurasians from the Hellenthal et al., 2014 dataset with 47 ancient individuals projected.** Modern individuals are shown as transparent circles, coloured by geographical region. Ancient samples are displayed as opaque shapes with black outlines. Shape is determined by archaeological context, while colour is dependent on the region of origin of the ancient sample. We observe the same patterns and clustering as we see in Fig.1 A and B of the main paper.

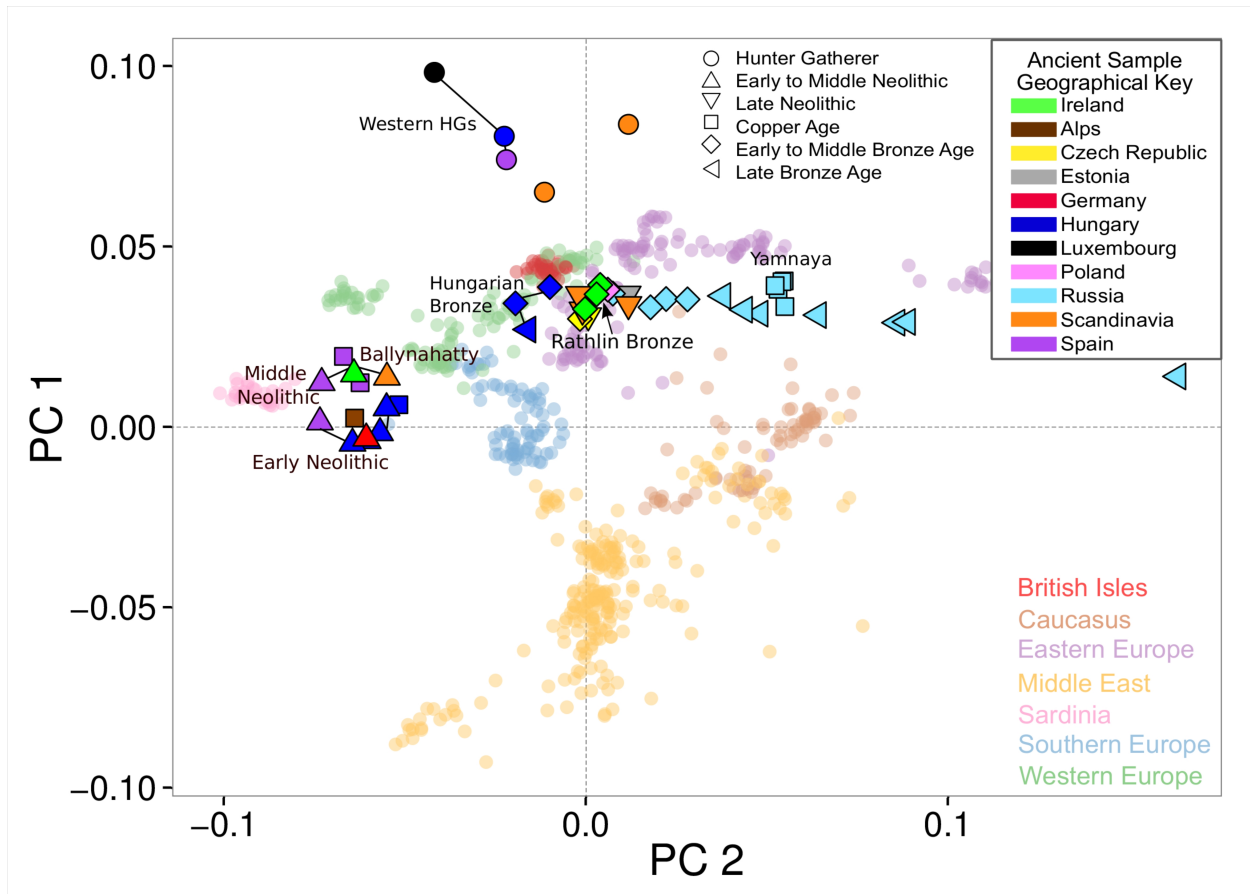



**Table S10.1. List of populations used for principal component analyses.**

| Human Origins Dataset |                       |                               | Hellenthal 2014 Dataset |                       |                               |
|-----------------------|-----------------------|-------------------------------|-------------------------|-----------------------|-------------------------------|
| Population Name       | Number of Individuals | Geographical Grouping for PCA | Population Name         | Number of Individuals | Geographical Grouping for PCA |
| Abkhasian             | 9                     | Caucasus                      | Adygei                  | 17                    | Caucasus                      |
| Adygei                | 17                    | Caucasus                      | Armenian                | 16                    | Caucasus                      |
| Albanian              | 6                     | Southern Europe               | Basque                  | 24                    | Western Europe                |
| Armenian              | 10                    | Caucasus                      | Bedouin                 | 45                    | Middle East                   |
| Ashkenazi_Jew         | 7                     | Eastern Europe                | Belorussian             | 8                     | Eastern Europe                |
| Balkar                | 10                    | Caucasus                      | Bulgarian               | 18                    | Eastern Europe                |
| Basque                | 29                    | Western Europe                | Chuvash                 | 17                    | Eastern Europe                |
| Belarusian            | 10                    | Eastern Europe                | Cypriot                 | 12                    | Middle East                   |
| Bergamo               | 12                    | Southern Europe               | Druze                   | 42                    | Middle East                   |
| Bulgarian             | 10                    | Eastern Europe                | EastSicilian            | 10                    | Southern Europe               |
| Canary_Islanders      | 2                     | Western Europe                | Egyptian                | 11                    | Middle East                   |
| Chechen               | 9                     | Caucasus                      | English                 | 6                     | British Isles                 |
| Chuvash               | 10                    | Eastern Europe                | Finnish                 | 2                     | Eastern Europe                |
| Croatian              | 10                    | Southern Europe               | French                  | 28                    | Western Europe                |
| Cypriot               | 8                     | Middle East                   | Georgian                | 20                    | Caucasus                      |
| Czech                 | 10                    | Eastern Europe                | GermanyAustria          | 4                     | Western Europe                |
| Druze                 | 39                    | Middle East                   | Greek                   | 20                    | Southern Europe               |
| English               | 10                    | Western Europe                | Hungarian               | 20                    | Eastern Europe                |
| Estonian              | 10                    | Eastern Europe                | Iranian                 | 20                    | Middle East                   |
| Finnish               | 7                     | Eastern Europe                | Ireland                 | 7                     | British Isles                 |
| French                | 25                    | Western Europe                | Jordanian               | 19                    | Middle East                   |
| French_South          | 7                     | Western Europe                | Lezgin                  | 18                    | Caucasus                      |
| Georgian              | 10                    | Caucasus                      | Lithuanian              | 10                    | Eastern Europe                |
| Georgian_Jew          | 7                     | Caucasus                      | NorthItalian            | 12                    | Southern Europe               |
| Greek                 | 20                    | Southern Europe               | Norwegian               | 18                    | Western Europe                |
| Hungarian             | 20                    | Eastern Europe                | Orcadian                | 15                    | British Isles                 |
| Icelandic             | 12                    | Western Europe                | Palestinian             | 46                    | Middle East                   |
| Iranian               | 8                     | Middle East                   | Polish                  | 16                    | Eastern Europe                |

|                |    |                 |              |    |                 |
|----------------|----|-----------------|--------------|----|-----------------|
| Iranian_Jew    | 9  | Middle East     | Romanian     | 14 | Eastern Europe  |
| Iraqi_Jew      | 6  | Middle East     | Russian      | 25 | Eastern Europe  |
| Italian_South  | 1  | Southern Europe | Sardinian    | 28 | Sardinia        |
| Jordanian      | 9  | Middle East     | Scottish     | 6  | British Isles   |
| Kumyk          | 8  | Caucasus        | SouthItalian | 18 | Southern Europe |
| Lebanese       | 8  | Middle East     | Spanish      | 34 | Western Europe  |
| Lezgin         | 9  | Caucasus        | Syrian       | 16 | Middle East     |
| Lithuanian     | 10 | Eastern Europe  | Turkish      | 17 | Middle East     |
| Maltese        | 8  | Southern Europe | Tuscan       | 8  | Southern Europe |
| Mordovian      | 10 | Eastern Europe  | Welsh        | 4  | British Isles   |
| Nogai          | 9  | Caucasus        | WestSicilian | 10 | Southern Europe |
| North_Ossetian | 10 | Caucasus        |              |    |                 |
| Norwegian      | 11 | Western Europe  |              |    |                 |
| Orcadian       | 13 | Western Europe  |              |    |                 |
| Russian        | 22 | Eastern Europe  |              |    |                 |
| Saami_WGA      | 1  | Eastern Europe  |              |    |                 |
| Sardinian      | 27 | Sardinia        |              |    |                 |
| Scottish       | 4  | Western Europe  |              |    |                 |
| Sicilian       | 11 | Southern Europe |              |    |                 |
| Spanish        | 53 | Western Europe  |              |    |                 |
| Spanish_North  | 5  | Western Europe  |              |    |                 |
| Syrian         | 8  | Middle East     |              |    |                 |
| Turkish        | 56 | Middle East     |              |    |                 |
| Turkish_Jew    | 8  | Middle East     |              |    |                 |
| Tuscan         | 8  | Southern Europe |              |    |                 |
| Ukrainian      | 9  | Eastern Europe  |              |    |                 |

## S11: ADMIXTURE Analysis

To estimate the different components of ancestry in our samples in relation to both modern populations worldwide and published ancient data we used a model-based clustering approach performed by the program ADMIXTURE v.1.23 (64).

A preliminary analysis was carried out on 1941 present-day humans belonging to 162 populations from the Human Origins dataset (21) alongside 77 ancient individuals, including the four Irish genomes from this study (See S9.1 for information on genotype calling and dataset creation). This dataset had been filtered for related individuals and SNPs with a genotyping rate below 98.5%. The remaining 288,822 positions were subsequently pruned for SNPs in strong linkage disequilibrium using PLINK v1.90 (54), with the parameters (`--indep-pairwise 200 25 0.4`), leaving a final 179013 SNPs for analysis. ADMIXTURE was run with cross-validation enabled using the `--cv` flag for all ancestral population numbers from  $K=2$  to  $K=20$ . This analysis was replicated 40 times over using random seeds chosen from the set 1 to 10000. The best of these replicates for each value of  $K$ , i.e. those with the maximum log likelihood (Figure S11.3), is presented in Figure S11.1.

We observed CV error to drop with increasing values of  $K$  until  $K=11$  at which point error values began to slowly rise again (Fig S11.2). The lowest median CV error was attained for  $K=11$ .

Admixture analysis was then repeated at  $K=11$  for 50 replicates using the same filtering, parameters and individuals as above with four additional genomes from Spain included (27, 28). As these genomes all were above 1X in coverage only 1023 SNPs were removed during the repeat filtering, leaving 177690 SNPs for analysis. The replicate possessing the highest log likelihood is displayed for all ancient individuals in Fig. 1C.

**Figure S11.1. ADMIXTURE results for the best of 40 replicates for each value of K.** Populations are arranged into geographical and temporal groupings. The lowest median CV error was attained for K=11.

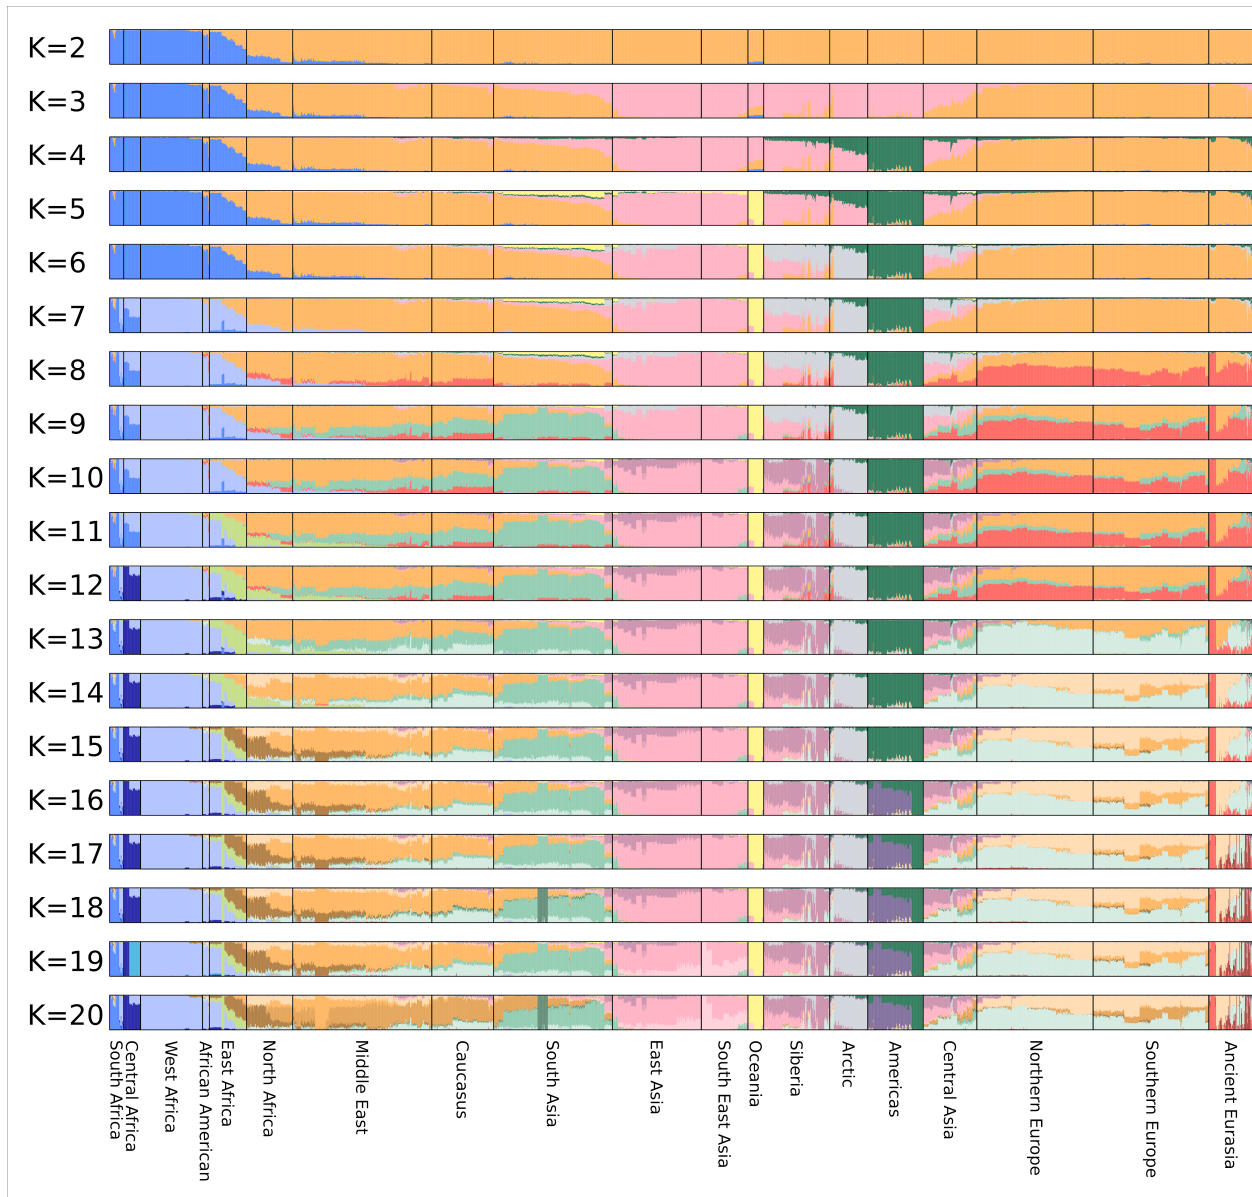

**Figure S11.2. Cross validation errors obtained for each value of K across 40 replicates of ADMIXTURE analysis.**

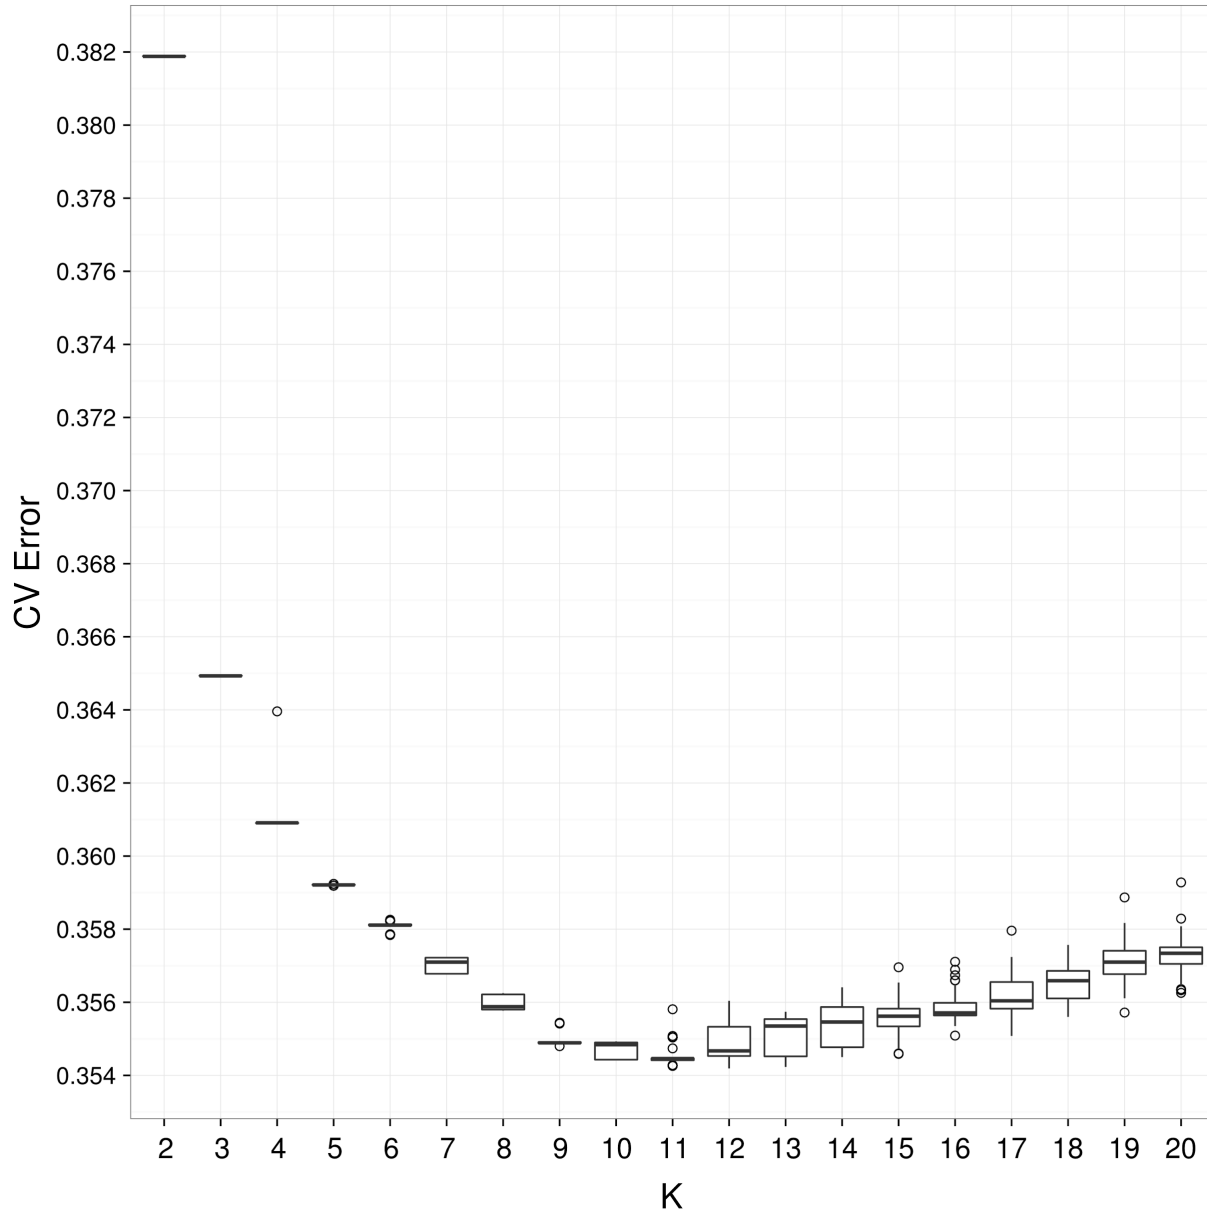

Figure S11.3 Log Likelihood for the best of 40 replicates of ADMIXTURE analysis for each value of K.

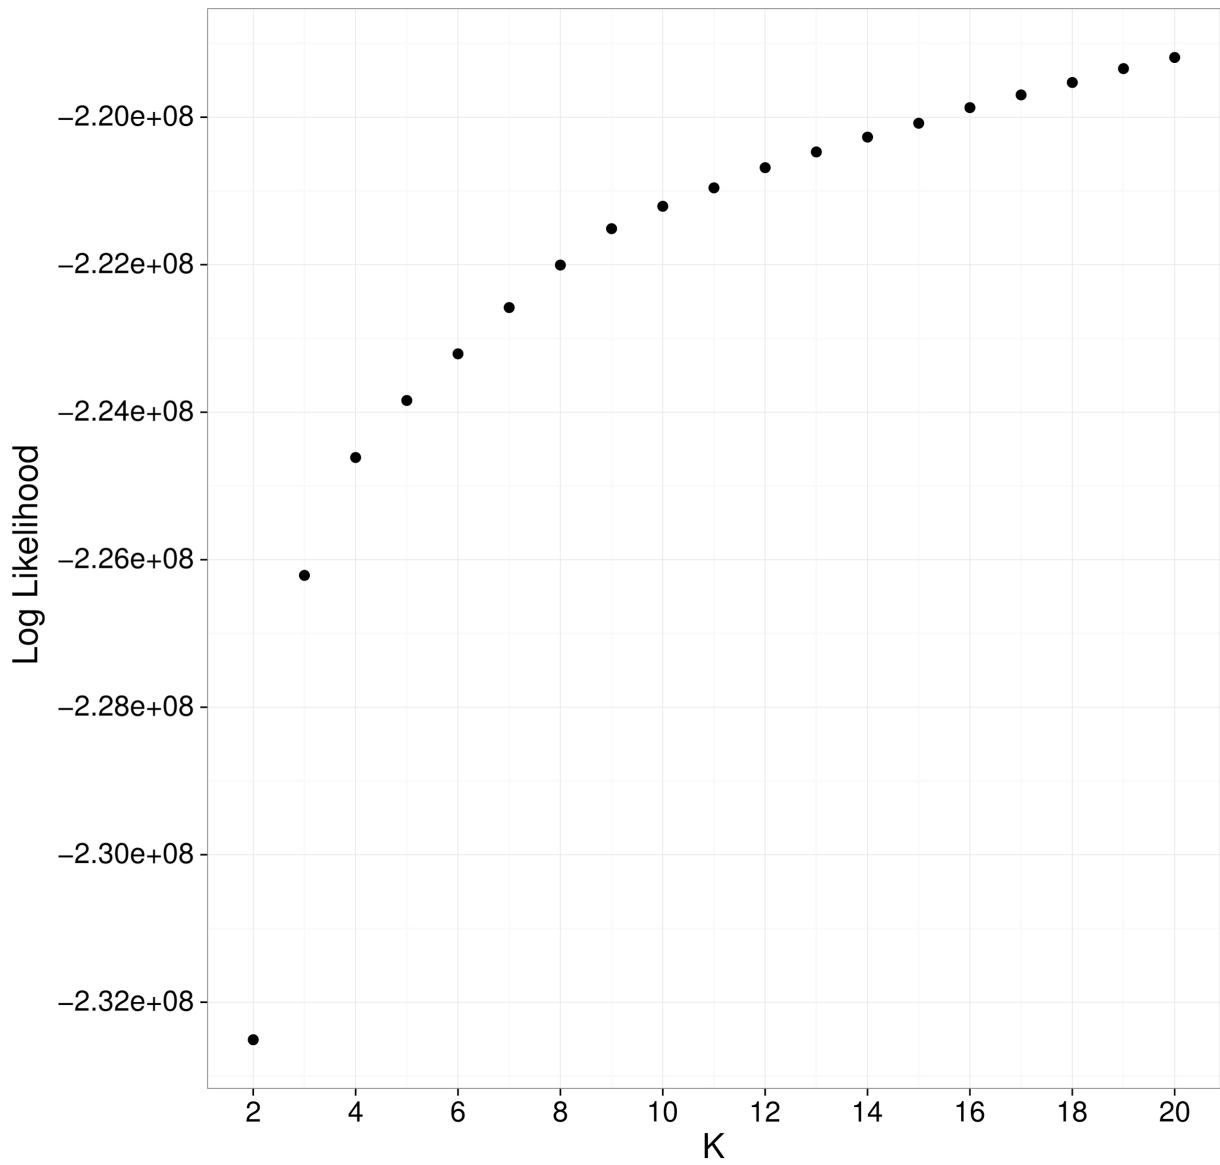

## S12: Formal Tests of Admixture implemented with D- and f-Statistics

In order to confirm the relationships between ancient samples that were visualised in PCA and ADMIXTURE analysis we carried out formal tests of admixture using D-statistics (65) and f-statistics (66, 67). These were employed using the ADMIXTOOLS package (67) with significance assessed using a block jackknife of 5cM in size. Statistics were considered significant if they possessed a Z-score greater than 3 (66, 67), which corresponds to a p-value of less than 0.001. All tests were carried out on the same dataset used in PCA and ADMIXTURE analysis (described in S9.1). For any tests that required an outgroup the Mbuti population of Central Africa was used, given their undetectable levels of Eurasian admixture (68). For information on ancient individuals used and population keys see Table S9.1

### S12.1 Outgroup $f_3$ -statistics

We used outgroup  $f_3$ -statistics to explore relationships between the ancient Irish genomes and other ancient populations and individuals. These were constructed in the form  $f_3(\text{Mbuti}; \text{IA}, \text{X})$ , where IA was each Irish ancient genome in turn and X was any other ancient individual or population. The magnitude of the resulting  $f_3$ -statistic is a measure of the amount of genetic drift shared between IA and OA since their split from Mbuti. Results are displayed in Figure S12.1.

Ballynahatty was seen to share the most drift with other Neolithics followed by western hunter gatherers (WHG), with the maximum scores observed for Spanish Cardial (Cardial\_EN), Epicaldial (Spanish\_EN) and Middle Neolithics (Spanish\_MN), as well as the Scandinavian Middle Neolithic Gok2. It is interesting to note that both the Scandinavian and Spanish Middle Neolithic individuals come from Megalithic contexts as does Ballynahatty.

The Irish Bronze Age individuals all shared high levels of drift with two western hunter gatherers, the Hungarian KO1 and Loschbour. Rathlin2, who falls temporally between the earlier Rathlin1 and later Rathlin3, also displayed high levels of drift with both these individuals. However, there does not appear to be an especially high amount of drift between Rathlin1 and Rathlin3. All three Rathlin Islanders also had relatively high values of sharing with the Corded Ware and other European Late Neolithic and Bronze Age populations, with a Sintashta individual giving a high value for Rathlin2 and Rathlin3 but not Rathlin1. All three also show lower affinities to the early Neolithic LBK culture, with magnitude of drift

increasing with Middle Neolithics. Of all Neolithic samples tested, Rathlin2 shares it's highest affinity with Cardial\_EN, Rathlin3 with Spanish\_MN, and Rathlin1 with the Scandinavian Middle Neolithic Gok2.

## **S12.2 D-Statistics**

All D-Statistic test results are reported in the supporting Dataset S1 file under Supporting Information.

### **S12.2.1 Neolithic Ballynahatty**

It is now clear that Neolithic genomes sampled in Hungary, Germany, Spain and Scandinavia all have majority contributions from early farmers migrating from the south (10, 18, 19, 21, 25, 43, 69). In PCA Ballynahatty is seen clustering with these genomes and shows a similar admixture profile to other Middle Neolithics, suggesting she too shares this large component of early farmer (EF) ancestry.

To confirm this, we first investigated Ballynahatty's relationship to the three Mesolithic hunter gather groupings from (25), eastern hunter gatherer (EHG), Scandinavian hunter gather (SHG) and western hunter gatherer (WHG) using the statistic  $D(\text{Mbuti}, \text{Ballynahatty}; \text{HG Group1}, \text{HG Group2})$ . Of the three, Ballynahatty shared the most alleles with WHG.

We compared Ballynahatty's hunter gatherer affinities to six Middle Neolithic and European Copper Age individuals/groups, Gok2 (Scandinavian), CO1 (Hungarian), Esperstedt\_MN (German), Oetzi (Alpine), Spanish\_CA and Spanish\_MN all of which clustered close to Ballynahatty on the PCA and shared similar admixture profiles. The statistic  $D(\text{Mbuti}, \text{MN/CA}; \text{HG Group1}, \text{HG Group2})$  was used, where MN/CA refers to all of the aforementioned samples. We observed Ballynahatty and Spanish\_CA to have the strongest preferences for WHG over SHG and EHG, while Esperstedt\_MN displayed the least.

The possibility of Ballynahatty being a WHG herself was ruled out with the statistic  $D(\text{Mbuti}, \text{Ballynahatty}; X, Y)$  where X and Y formed the three combinations of the Spanish, Luxembourg and Hungarian WHG genomes. In all cases the WHG genomes belong in a clade excluding Ballynahatty. Of the three WHG individuals Ballynahatty appeared to share the least amount of affinity with LaBranca and the largest with Loschbour, but not significantly so.



The degree of WHG admixture in Ballynahatty was compared to three Early Neolithic groups, LBK\_EN, Hungarian\_EN and Spanish\_EN, as well as two Early Neolithic individuals, Stuttgart and Cardial\_EN (See table S9.1) using the statistic  $D(\text{Mbuti, WHG; Ballynahatty, EN})$ . This gave a significant indication of WHG introgression in Ballynahatty compared to early Spanish, Hungarian and LBK Neolithics ( $|Z|=1.342 - 7.063$ ), akin to that seen when Ballynahatty is replaced with other Middle Neolithics. Middle Neolithic samples showed the lowest affinities to WHG when Cardial\_EN was the Early Neolithic used, indicating possible increased WHG in Cardial\_EN compared to other Early Neolithics.

The test  $D(\text{Mbuti, WHG; Ballynahatty, MN/CA})$  gives no significant statistic of gene flow suggesting Ballynahatty forms a clade with other Middle Neolithics separate to WHG. The only exception to this is when MN/CA is Spanish\_MN which appears to have experienced significantly more WHG gene flow than Ballynahatty.

To measure the rough proportion of Ballynahatty's ancestry derived from WHG we used the  $f_4$  ratio  $f_4(\text{Mbuti, Loschbour; Ballynahatty, Dai})/f_4(\text{Mbuti, Loschbour; KO1, Dai})$  (70). From this we estimated a WHG component of  $42 \pm 2\%$  within a predominantly early farmer genome, a result similar to that seen in ADMIXTURE analysis.

Ballynahatty's affinity to different Early Neolithic populations was assessed using the statistic  $D(\text{Mbuti, Ballynahatty; EN1, EN2})$ . Ballynahatty appeared to share the most alleles with Cardial\_EN and Spanish\_EN. In order to confirm that this observation was not simply the result of increased WHG ancestry in Cardial\_EN and Spanish\_EN relative to other Early Neolithics, the test was repeated with other MN/CA members in the place of Ballynahatty to see if patterns of allele sharing differed in these samples. This test revealed Early Neolithic affinity to be somewhat correlated to geographical location. The Hungarian Copper Age sample, CO1, showed the highest affinity with Hungarian\_EN, Spanish\_MN and Spanish\_CA with Spanish\_EN and Cardial\_EN, and the German Esperstedt\_MN with LBK\_EN.

The affinity of Ballynahatty to different Middle Neolithic and Chalcolithic (MN/CA) samples was also explored as above ( $D(\text{Mbuti, Ballynahatty; MN/CA1, MN/CA2})$ ), and the Irish farmer was seen to have the most allele sharing with the Scandinavian individual Gok2, followed by Spanish\_MN. Both this and the above result agree with those from the outgroup  $f_3$ -statistics, identifying other Atlantic Neolithic individuals as the samples with whom Ballynahatty shares the most genetic drift.

### S12.2.2 Bronze Age Rathlin

Prior studies (10, 25, 26) convincingly demonstrate that Central European genomes from the Late Neolithic and Early Bronze Age differ from the preceding Middle Neolithic due to a massive immigration of Steppe herders linked to cultures such as the Yamnaya. This is initially and most strongly apparent at the Corded Ware horizon. Accordingly, we employed a series of tests to gauge whether the ancestries of the Rathlin Early Bronze Age genomes were subject to this influence and if so to what extent.

First, we confirmed that the five Middle Neolithic and Southern Central European Copper Age individuals, Ballynahatty, Gok2 (Scandinavian), CO1 (Hungarian), Oetzi (Alpine) and Esperstedt\_MN (German), and two populations Spanish\_MN and Spanish\_CA, the whole group referred to as MN/CA, always form clades with each other to the exclusion of the Irish Bronze Age individuals. For this we used the statistic  $D(\text{Mbuti}, \text{Irish\_Bronze}; \text{MN/CA1}, \text{MN/CA2})$ . No significant gene flow ( $|Z| > 3$ ) was observed. However, slightly higher correlation with Gok2 compared to other MN/CA members was seen for Rathlin1 and Rathlin3. This affinity is also noted in the previous outgroup  $f_3$ -statistics. Overall, the results suggests that the Irish Bronze Age was not simply a continuation of the Irish Middle Neolithic, or indeed any European Middle Neolithic group so far sampled.

We then demonstrated significant evidence for both Yamnaya ( $|Z|= 2.341 - 9.596$ ) and EHG ( $|Z|= 1.618 - 8.864$ ) introgression into each Irish Bronze Age sample when placed in a clade with the different members of MN/CA in turn using the statistic  $D(\text{Mbuti}, \text{Yamnaya or EHG}; \text{Irish Bronze Age}, \text{MN/CA})$ , with the strongest signals occurring with Ballynahatty and Spanish\_CA as the MN/CA sample. Ballynahatty, of all Middle Neolithics, has the lowest affinity to EHG, while Esperstedt\_MN has the highest, which may account for the variance in the level of Yamnaya/EHG introgression detected in the Irish Bronze depending on the MN/CA member used. Interestingly, no significant WHG gene flow into the Irish Bronze age was seen to the exclusion of MN/CA groups, with the reverse appearing to be the case for a majority combinations. This demonstrates that the increased affinity to Eastern Hunter Gatherer and Yamnaya ancestry in the Irish Bronze Age is not likely the result of more local hunter gatherer admixture.

We also showed that the Irish Bronze Age samples display significant Middle Neolithic introgression ( $|Z| = 3.485 - 9.911$ ) when placed in a clade with Yamnaya (D(Mbuti, MN/CA; Irish Bronze, Yamnaya)). We observed different levels of introgression into the Irish Bronze Age depending on the MN/CA group or individual in question, with the highest Z scores obtained for Spanish\_CA, Ballynahatty and the Scandinavian Individual, Gok2. The variance in detectable gene flow depending on the MN/CA member used, while possibly again the result of differing MN/CA affinities with Yamnaya/EHG as noted above, changed when the Irish Bronze Age samples were replaced by other Late Neolithic and Bronze Age (LN/BA) populations from Germany. These groups showed the highest levels of gene flow from Spanish\_MN, Spanish\_CA and Esperstedt\_MN, with the exception of the Bell Beaker group who had the highest affinity with the Spanish\_MN, Spanish\_CA and Oetzi. The Nordic LN showed greatest introgression from the two Chalcolithics individuals, Oetzi and CO1.

The above result hinted at possible increased correlation between Ballynahatty and Irish Bronze Age compared to continental samples. However, the Irish Bronze Age showed no significant introgression from Ballynahatty when placed in a clade with continental LN/BA populations (D(Mbuti, Ballynahatty; Irish Bronze Age, Continental LN/BA)), with results actually suggesting higher correlation between Ballynahatty and certain continental samples, most significantly the Hungarian Bronze Age ( $|Z| = 1.909 - 2.881$ ). A similar result was obtained when Ballynahatty was replaced with the Scandinavian Middle Neolithic Gok2. However, when Spanish\_MN or Esperstedt\_MN took Ballynahatty's place significant introgression into continental LN/BA populations to the exclusion of the Irish Bronze Individuals was seen, with the notable exception of the Nordic LN. This indicates that while the Irish Bronze Age contains a substantial amount of Middle Neolithic ancestry we find no strong evidence to suggest that the Irish population from which Ballynahatty came was its source. It is also not likely to be identical to the component of Middle Neolithic ancestry found in German LN/BA samples, or indeed any continental LN/BA so far sampled.

We also observed that for most cases the Irish Bronze Age samples form a clade with each other to the exclusion continental LN/BA samples (D(Mbuti, Continental LN/BA; X, Y), where X and Y are a pair of Irish Bronze Age individuals), with Rathlin3 showing slightly higher affinities to continental samples compared to the earlier Rathlin1 and Rathlin2. The exception to this is the strong signal of introgression seen into Rathlin1 from BenzigerodeHeimburg\_LN when placed in clade with Rathlin2 or Rathlin3 ( $|Z| = 2.206 - 3.594$ ). This preference is also seen in outgroup  $f_3$ -statistics.

The above results, along with PCA and ADMIXTURE analysis, indicates that the Irish Bronze Age is composed of a mixture of Middle Neolithic and Steppe Ancestry as previously shown to be the case with other continental LN/BA samples (25, 26). To envisage the proportion of Yamnaya/EHG to Middle Neolithic ancestry in each Irish Bronze Age sample we implemented three methods. The first comes from ADMIXTURE analysis (Figure 1), where we make use of the fact that the green component of West and Central European ancestry does not appear until the Bronze Age. We presume an ultimate source of this component as the Yamnaya where it is present at an average ratio of 40:60 to the red ‘hunter gatherer’ component. This red component of ancestry is also in the European Bronze Age and most likely the result of contributions from both Middle Neolithic and Yamnaya populations. In our three Irish Bronze Age samples we see the green component at a level of 6-13%, which, taking into account the 40:60 ratio, implies a total of 14-33% Yamnaya ancestry and 67-86% Middle Neolithic in the Irish Bronze Age.

The second method estimated the amount of Middle Neolithic ancestry in the Irish Bronze Age by using the ratio  $f_4(\text{Mbuti, Ballynahatty ; X, Dai})/f_4(\text{Mbuti, Ballynahatty; Gok2, Dai})$ . These two Middle Neolithics were chosen due to their lower affinity with Yamnaya and EHG compared to Esperstedt\_MN and Spanish\_MN. This gave us an estimated range of  $72 \pm 4\%$  to  $74 \pm 5\%$  for the Middle Neolithic component in the Irish Bronze Age genomes.

Finally, we followed the methods of (25), using the qpWave and qpAdm programs in the ADMIXTOOLS package (67), to estimate the mixture proportions of three different source populations, LBK (Early Neolithic), Loschbour (WHG) and Yamnaya, in the Irish Bronze Age group (the target population). A set of 15 outgroup populations (Ami, Biaka, Bougainville, Chukchi, Eskimo, Han, Hadza, Ju\_hoan\_North, Karitiana, Mbuti, Nganasan, Papuan, She, Ulchi and Yoruba), devoid of any recent gene flow with the source or target populations, was used to estimate mixture proportions, based on the idea that these outgroups are not identically related to the source populations. The results received indicated a WHG proportion at  $26 \pm 12\%$ , Early Neolithic at  $35 \pm 6\%$  and Yamnaya at  $39 \pm 8\%$

The overlap of these three estimates falls at approximately 32%.

**Figure S12.1. Outgroup  $f_3$ -Statistics for each ancient Irish Individual.** Tests in the form  $f_3(\text{Mbuti}; \text{IA}, \text{X})$ , where IA is an Irish ancient genome and X is any other ancient individual or population. Data points are coloured by archaeological context.

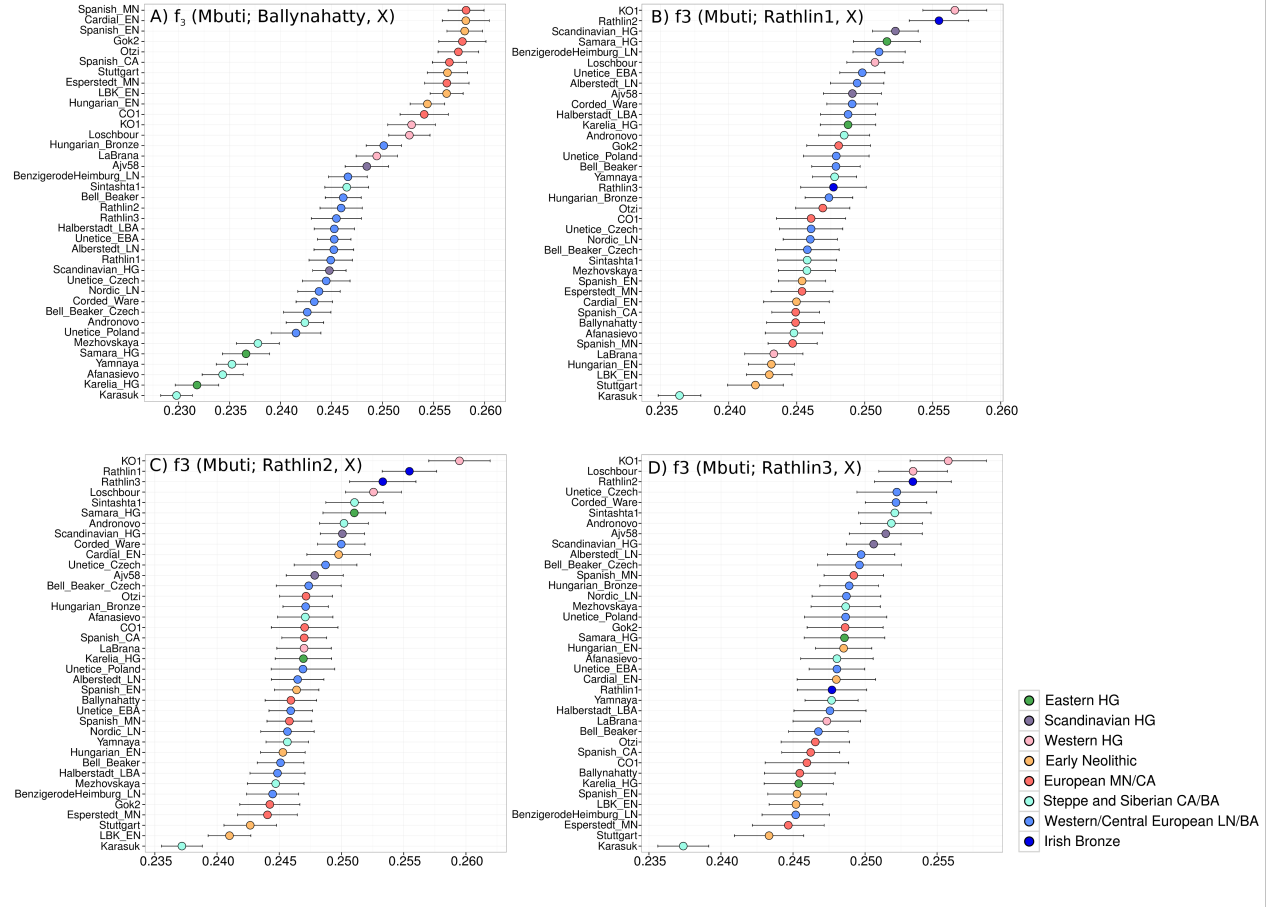

## S13: Runs of Homozygosity

Runs of homozygosity (ROH) analysis was carried out on Ballynahatty and Rathlin1 and the four other high coverage ancient European samples available, one Mesolithic from Luxembourg (21), Loschbour, two Early Neolithics from Hungary (10) and Germany (21), NE1 and Stuttgart, and one Bronze Age sample from Hungary (10), BR2, alongside 2527 modern individuals using 1,601,314 transversion SNPs called securely across all samples (detailed dataset preparation is described in SI 9.3). ROH were called using PLINK v1.90 (54) following the specifications used in (10) (--homozyg, --homozyg-density 50, --homozyg-gap 100, --homozyg-kb 500, --homozyg-snp 50, --homozyg-window-het 1, --homozyg-window-snp 50 and --homozyg-window-threshold 0.05).

Individual ROH were divided first into two classes, long ROH ( $\geq 1.6$  Mb), indicative of recent endogamy, and short to intermediate ( $<1.6$  Mb), a result of more ancient population bottlenecks (71). For both classes, the summed total length of ROH was calculated for every individual. These values were then plotted against each other (Figure S13.1) giving an overview of ROH length distribution for all genomes, modern and ancient.

To investigate the length distribution of ROH in more detail we placed our ROH into size bins (72) and calculated the total length of ROH in each bin for each individual. For this analysis we selected single individuals from a subset of populations from 1000 Genomes Phase 3 v5, avoiding those known to have experienced substantial historical admixture. Each individual selected displayed the median value of that population for total fraction of the genome under ROH. In cases where two median individuals existed one was selected at random. We also filtered the 23 modern individuals from the Simons Genome Diversity Project (61) removing those belonging to a population already represented in the 1000 Genomes set. The remaining individuals exist in pairs belonging to various populations. We selected one individual at random from each pair for analysis, with the exception of those from Native American and Oceanian populations where both members of the pair were retained. This left us with a total of 32 modern individuals alongside our 6 ancient genomes for ROH size bin analysis, plotted in the Main Paper Fig. 2.

**Figure S13.1. Total lengths of short to intermediate ROH (<1.6Mb) plotted against the total length of long ROH ( $\geq 1.6$  Mb).** ROH calls for 2527 modern and 6 ancient individuals were based on 1.6M autosomal transversions with minor allele frequencies above 0.5%

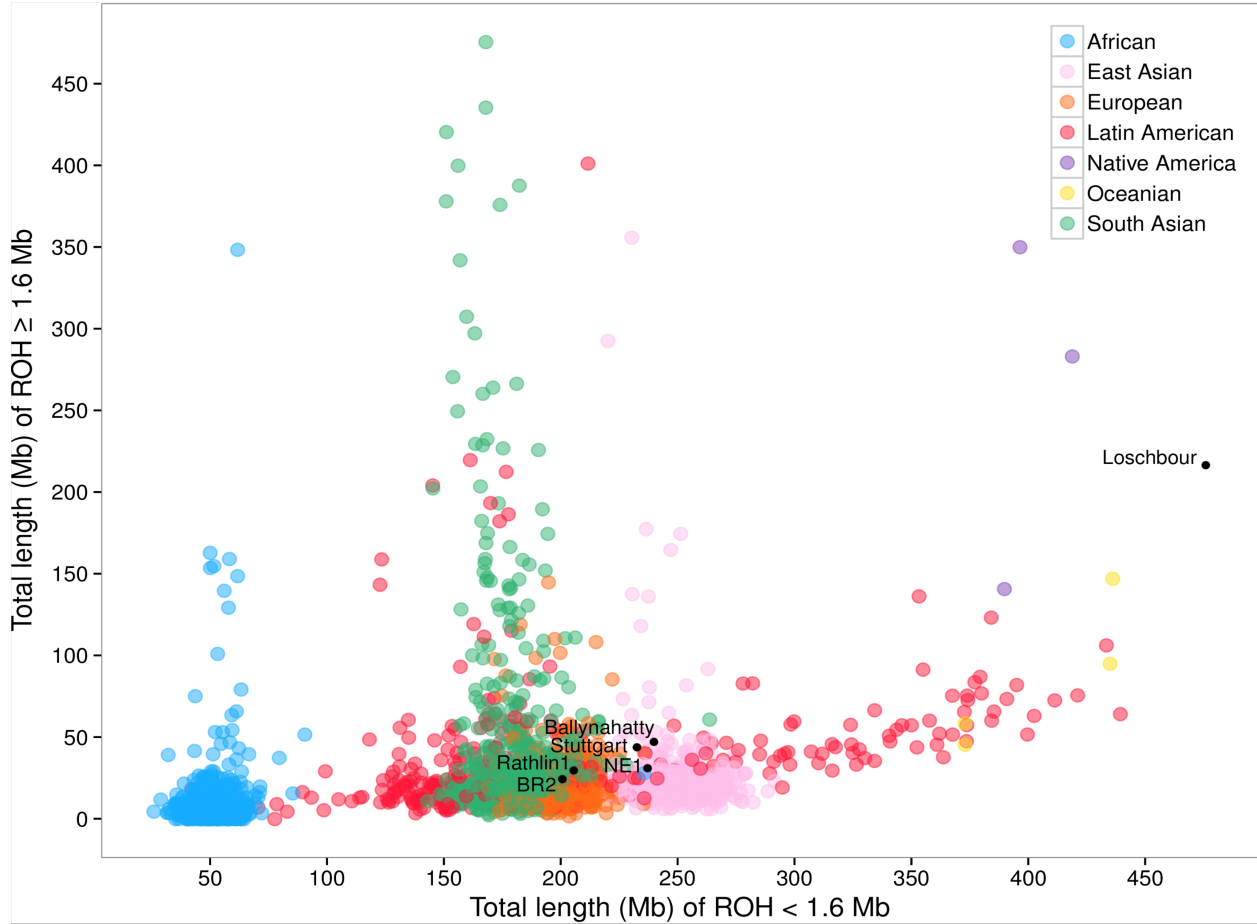

## S14: Haplotype-based Analysis with ChromoPainter

We followed a similar approach to (21) and used FineStructure v.2 ([www.paintmychromosomes.com](http://www.paintmychromosomes.com); ref. 73) to investigate population structure in our data. The analysis was performed on the same set of high coverage ancient samples in the above S13. Diploid genotype calling is described in the final paragraph of S9.2. In order to maximize the number of SNPs for analysis, each high coverage sample was analysed separately with a set of modern Eurasian genotypes from the Hellenthal 2014 dataset (59) (Modern individuals are the same as those used in PCA; see Table S10.1), keeping only SNPs confidently called across all individuals within each dataset (238,762-356,240 SNPs, Table S14.1). Modern populations were divided into larger geographical groupings based on (59).

For each dataset, we split the genotype data by chromosome and phased genotypes with SHAPEIT v2.r778 (74). Haplotype files were converted to ChromoPainter format using “impute2chromopainter.pl” and a recombination map was created using “makeuniformrecfile.pl” both available at <http://www.paintmychromosomes.com/>. We then ran the ChromoPainter analysis, linked mode, first by estimating “mu” and “Ne”, followed by estimating “c” and using “Chromocombine” to create a genome wide ChromoPainter output for all individuals. We calculated median chunk donation from each ancient individual to populations in the modern dataset (Table S14.2) in order to ascertain patterns of haplotypic affinity and performed linear regression analysis using the “visreg” package (75) of the R programming language (76) (Figure S14.1). The correlogram shown in Figure S14.2. was produced using the “corrgram” package (<http://CRAN.R-project.org/package=corrgram>).

To allow for a visual comparison of the geographical distribution of haplotype sharing between ancient samples and modern populations (Main paper, Fig. 3), we first calculated the median of the chunks donated by each ancient individual to each separate population (Table S14.2). These values were then normalised by scaling between 0 and 1 and plotted as interpolated maps using the *Geostatistical Analyst* tool of the ArcMap component of the ArcGIS (v10.1) software suite (ESRI).



**Figure S14.1 Selected pairwise regression plots of haplotype donation by ancient genomes to a set of modern genomes.** Colour keys are West Asia (brown), South Middle East (orange), East Europe (purple) South Europe (blue) and Northwest Europe (green). Specific samples are labelled: En - English; Ir - Ireland; Sa - Sardinian; Sc - Scottish; Sp - Spanish; We - Welsh.

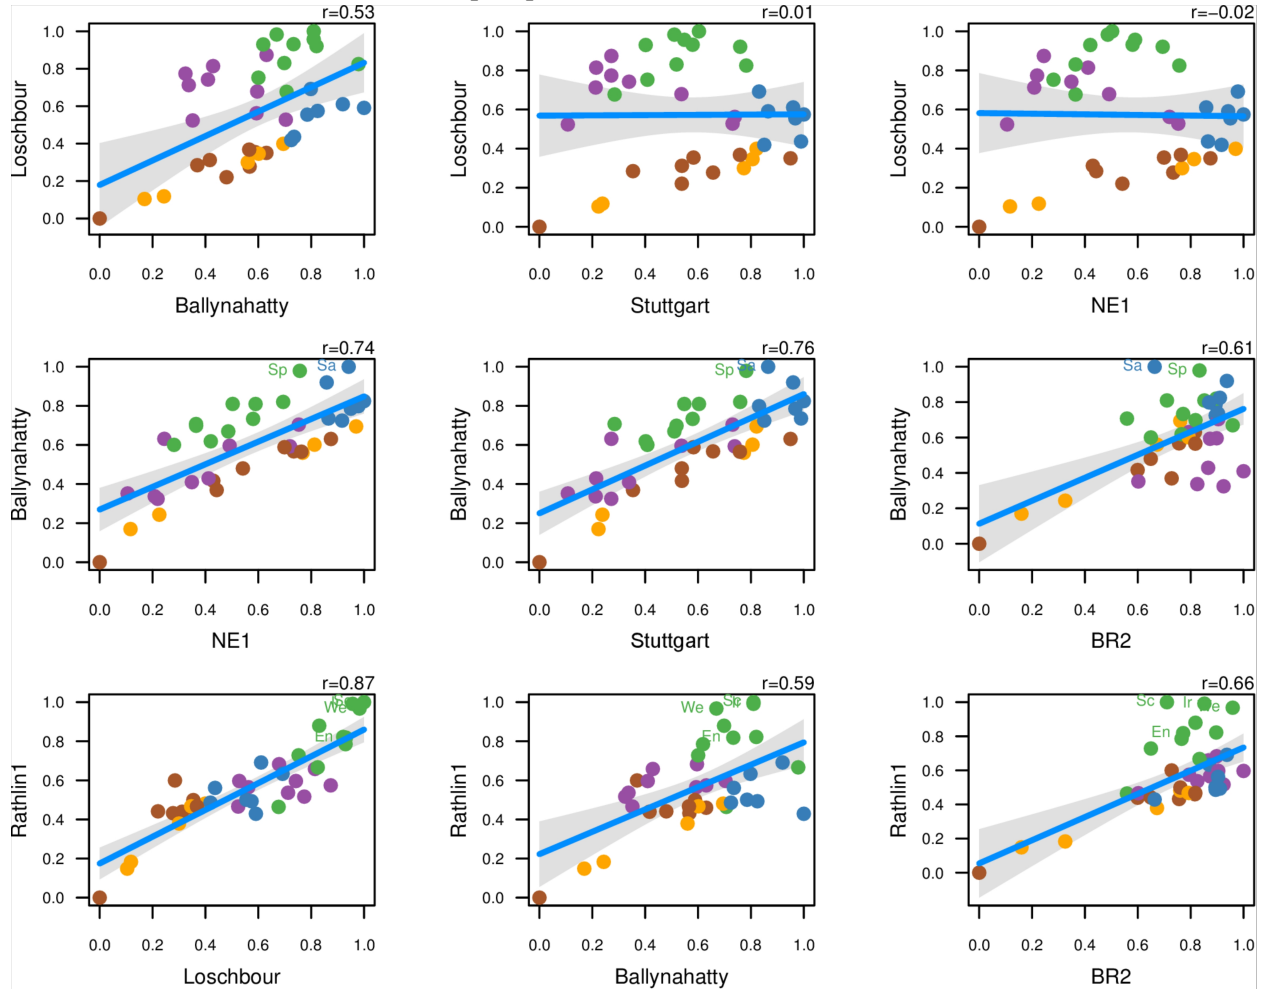

**Figure S14.2. Correlation matrix plot of median chunk donation from ancient samples to modern populations.** Left-hand side numbers represent correlation coefficients, confidence intervals and p-values for the pairwise correlation tests.

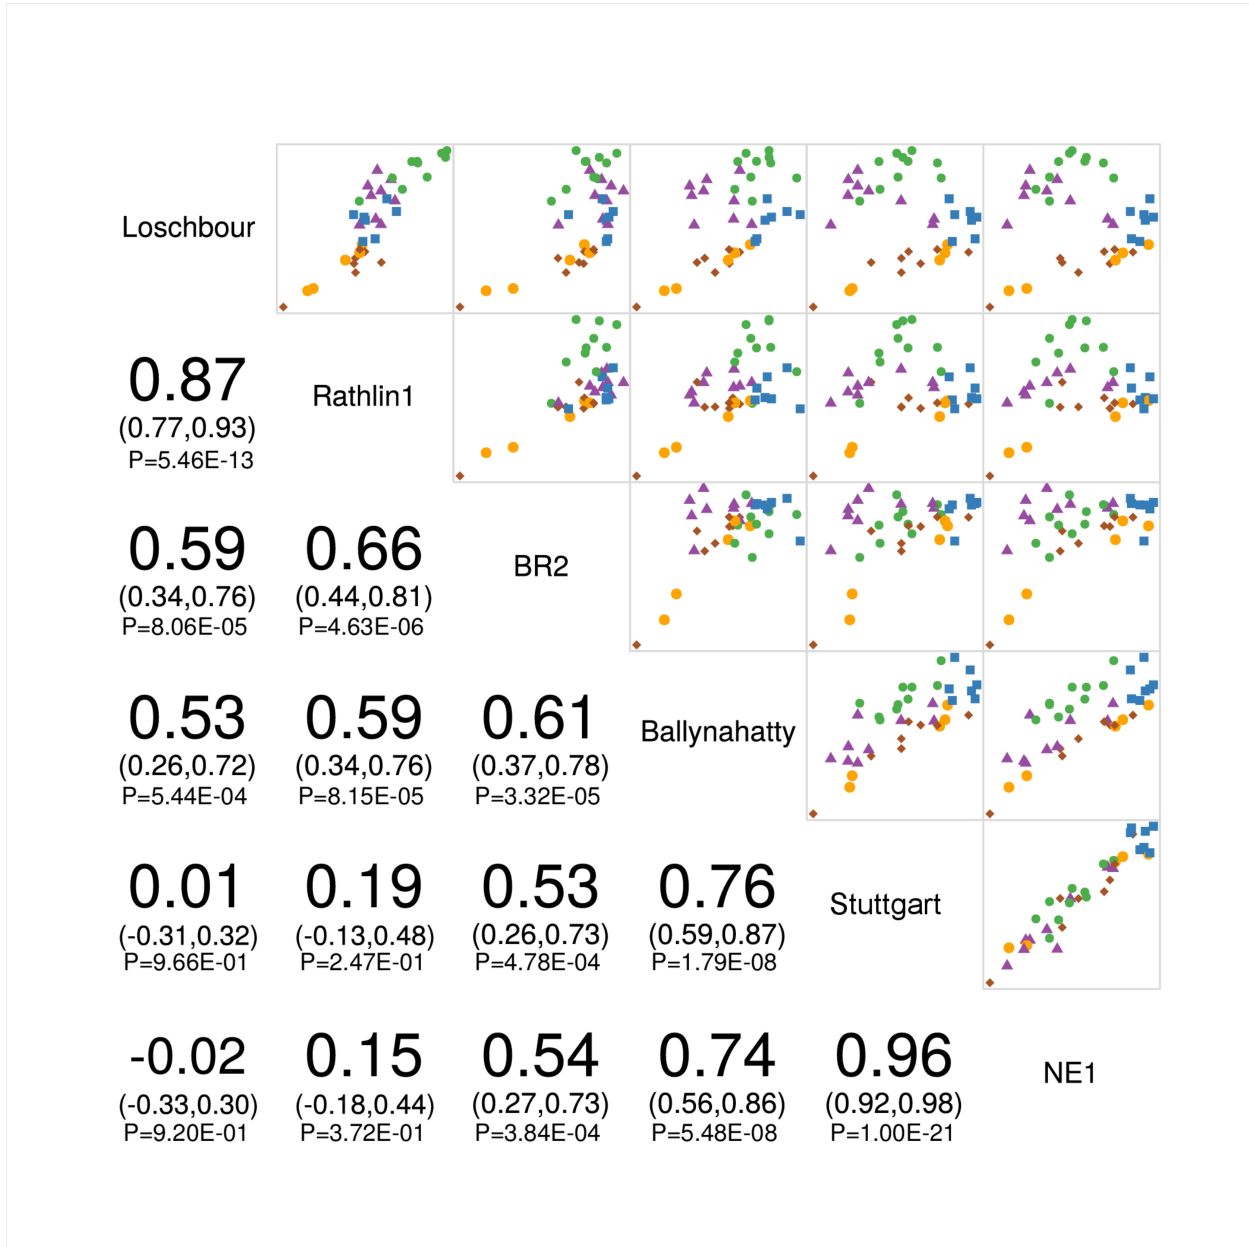

**Table S14.1. Number of SNPs used in each separate ChromoPainter run.**

| <b>Ancient Sample</b> | <b>Context</b>            | <b>SNPs</b> |
|-----------------------|---------------------------|-------------|
| Ballynahatty          | Irish Middle Neolithic    | 238762      |
| Rathlin1              | Irish Bronze Age          | 257516      |
| BR2                   | Hungarian Bronze Age      | 356240      |
| LBK                   | German Early Neolithic    | 334345      |
| Loschbour             | Luxembourg Mesolithic     | 347914      |
| NE1                   | Hungarian Early Neolithic | 347671      |

Each ancient sample was merged separately with the modern dataset. Only genotypes called at high quality in the ancient sample were retained for analysis.

**Table S14.2. Median haplotype donation from high coverage Ancients to modern populations.**

| <b>Population</b> | <b>Hellenthal et al. 2014<br/>Grouping</b> | <b>Ballynahatty</b> | <b>NE1</b> | <b>Rathlin1</b> | <b>BR2</b> | <b>Loschbour</b> | <b>Stuttgart</b> |
|-------------------|--------------------------------------------|---------------------|------------|-----------------|------------|------------------|------------------|
| Adygei            | West Asia                                  | 20.68               | 24.661     | 23.240          | 23.488     | 20.572           | 26.263           |
| Armenian          | West Asia                                  | 23.376              | 29.392     | 23.060          | 25.908     | 19.577           | 28.188           |
| Basque            | Northwest Europe                           | 25.878              | 23.644     | 23.824          | 22.865     | 31.063           | 22.107           |
| Bedouin           | South Middle East                          | 16.267              | 19.79      | 16.341          | 16.707     | 14.589           | 21.112           |
| Belorussian       | East Europe                                | 20.903              | 24.381     | 28.418          | 27.603     | 35.017           | 20.967           |
| Bulgarian         | East Europe                                | 23.838              | 29.17      | 26.210          | 27.713     | 27.767           | 29.526           |
| Chuvash           | East Europe                                | 19.525              | 19.618     | 23.865          | 23.528     | 26.663           | 19.217           |
| Cypriot           | West Asia                                  | 24.509              | 31.578     | 23.720          | 26.83      | 21.676           | 32.972           |
| Druze             | West Asia                                  | 13.231              | 17.977     | 12.825          | 14.239     | 11.596           | 17.465           |
| EastSicilian      | South Europe                               | 27.28               | 32.751     | 24.689          | 28.033     | 27.559           | 33.268           |
| Egyptian          | South Middle East                          | 25.657              | 33.06      | 24.220          | 25.977     | 23.075           | 30.873           |
| English           | Northwest Europe                           | 26.346              | 27.001     | 32.213          | 26.143     | 38.388           | 26.927           |
| Finnish           | East Europe                                | 24.521              | 21.779     | 26.431          | 26.49      | 36.735           | 21.907           |
| French            | Northwest Europe                           | 27.901              | 28.77      | 32.299          | 28.072     | 38.089           | 29.863           |
| Georgian          | West Asia                                  | 21.815              | 26.399     | 23.284          | 24.252     | 17.939           | 26.256           |
| GermanyAustria    | Northwest Europe                           | 25.721              | 23.648     | 33.658          | 26.862     | 35.486           | 25.931           |
| Greek             | South Europe                               | 26.191              | 32.232     | 24.341          | 28.043     | 23.651           | 31.351           |
| Hungarian         | East Europe                                | 23.889              | 25.62      | 28.995          | 28.098     | 31.116           | 26.236           |
| Iranian           | West Asia                                  | 23.758              | 28.846     | 24.648          | 25.984     | 21.784           | 26.979           |
| Ireland           | Northwest Europe                           | 27.712              | 27.146     | 36.313          | 27.383     | 39.116           | 26.412           |
| Jordanian         | South Middle East                          | 23.25               | 29.913     | 21.811          | 24.617     | 20.226           | 30.092           |
| Lezgin            | West Asia                                  | 19.837              | 24.858     | 27.028          | 25.472     | 19.786           | 23.243           |
| Lithuanian        | East Europe                                | 19.034              | 21.383     | 25.067          | 28.503     | 33.855           | 21.901           |
| NorthItalian      | South Europe                               | 27.514              | 33.191     | 27.829          | 27.658     | 31.498           | 31.03            |
| Norwegian         | Northwest Europe                           | 24.298              | 24.512     | 31.425          | 26.05      | 38.35            | 24.028           |
| Orcadian          | Northwest Europe                           | 23.969              | 22.349     | 30.072          | 24.263     | 33.238           | 24.132           |
| Palestinian       | South Middle East                          | 17.58               | 21.484     | 17.164          | 19.261     | 14.999           | 21.354           |
| Polish            | East Europe                                | 20.559              | 23.398     | 26.957          | 29.67      | 32.947           | 23               |
| Romanian          | East Europe                                | 25.823              | 29.687     | 26.962          | 28.193     | 26.781           | 29.392           |
| Russian           | East Europe                                | 19.257              | 21.215     | 25.537          | 26.969     | 32.093           | 20.937           |
| Sardinian         | South Europe                               | 31.118              | 32.621     | 22.989          | 24.481     | 28.592           | 31.59            |
| Scottish          | Northwest Europe                           | 27.715              | 25.798     | 36.512          | 25.197     | 40.362           | 27.316           |
| SouthItalian      | South Europe                               | 26.385              | 31.434     | 26.127          | 28.182     | 24.148           | 33.621           |
| Spanish           | Northwest Europe                           | 30.743              | 29.748     | 28.613          | 27.097     | 35.322           | 30.236           |
| Syrian            | South Middle East                          | 23.988              | 30.613     | 23.896          | 26.466     | 21.554           | 30.624           |
| Turkish           | West Asia                                  | 23.346              | 29.84      | 23.886          | 26.855     | 22.182           | 29.845           |
| Tuscan            | South Europe                               | 29.681              | 31.328     | 29.202          | 28.696     | 29.158           | 33.133           |
| Welsh             | Northwest Europe                           | 25.202              | 25.539     | 35.745          | 29.037     | 39.871           | 25.798           |
| WestSicilian      | South Europe                               | 27.977              | 33.526     | 24.509          | 28.289     | 28.124           | 33.792           |

## S15: Phenotypic Analysis

A panel of SNPs, small indels and multi-allelic markers were chosen for examination in the four ancient Irish humans. This was composed of variants shown to have well-established phenotypic associations with traits such as pigmentation, immunity, disease susceptibility, diet and blood group. Also included were markers linked to genetic disorders relatively common in Ireland today.

For the two genomes with coverage over 10X (Ballynahatty and Rathlin1) genotype calls were generated using UnifiedGenotyper in GATK v2.4-7 (15). Only bases with a quality above 30 were considered for calling (-mbq 30). All genotype calls are reported in the accompanying tables, however genotypes with a quality below 30 are not considered to be reliable.

We could not call diploid genotypes to a satisfactory level of accuracy in the two genomes under 2X coverage (Rathlin2 and Rathlin3) using the UnifiedGenotyper tool. Instead we use the Pileup tool in GATK v2.4 (15) to report the base calls for all reads covering each site with a base quality over 30.

### S15.1 Pigmentation

To investigate the pigmentation phenotype of each ancient Irish human two approaches were taken. For the two higher coverage samples the Hirisplex SNP panel for forensic hair and eye colour inference was utilized (77). These SNPs are also reported for the low coverage genomes, however lack of data prevented accurate results from the prediction models (Table S15.1). The second approach, based on (21), saw both low and high coverage samples being assessed at SNPs marking several haplotypes in the HERC2/OCA2 region associated with eye colour (78, 79) (Tables S15.3 and S15.4), as well as 16 SNPs comprising a 78-kb SLC24A5 haplotype (C11) that is strongly associated with the derived light skin colour allele A111T of rs1426654 (80) (Table S15.5).

The Neolithic individual, Ballynahatty, was assigned a dark, black hair colour and brown eyes by the Hirisplex prediction model at high probability scores (Table S15.2). The predicted eye colour was in agreement with the observed genotypes of Ballynahatty in SNPs marking several haplotypes in the HERC2/OCA2 region where the individual was either homozygous for the allele not associated with blue

eyes or a heterozygote. In regards to skin colour, Ballynahatty was found to be homozygous for the SLC24A5 haplotype C11 associated with lighter pigmentation.

For the high coverage Bronze Age Individual, Rathlin1, the Hirisplex probability scores, although not high enough for confident predictions, suggest a light hair shade, possibly blonde in colour, and brown eyes. Examining the various haplotypes in the HERC2/OCA2 region Rathlin1 was found to be a heterozygote in each case for the blue eye colour associated haplotype. The individual was also found to be homozygous for the SLC24A5 pigmentation-lightening haplotype C11.

In the two lower coverage Bronze Age individuals, Rathlin2 and Rathlin3, we found both displayed the blue eye associated allele in the vast majority base calls at sites marking several haplotypes in the HERC2/OCA2 region. Both samples also appear to carry the C11 haplotype of the SLC24A5 region.

## **S15.2 ABO blood groupings**

To ascertain each sample's ABO blood group genotypes a panel of six diagnostic SNPs in the ABO gene were assessed (Table S15.6). Three of these, rs8176719 (81), rs505922 and rs687289 (82), were used as markers for the O allele, two for the B allele, rs8176746 and rs8176746, and one, rs8176704, for the A2 allele (82). Ballynahatty and Rathlin1 both presented as heterozygotes for the ancestral A1 allele and the O allele. Rathlin2 is also a possible A1/O or B/O heterozygote, however low coverage depth at the diagnostic sites and the risk of deamination obscuring results does not allow us to confirm this result. Finally, Rathlin3 appears to contain at least one A1 allele.

## **S15.3 Genetic Disorders at high frequency in present day Ireland**

There are a number of inherited conditions common in Europe, for which some of their causative mutations reach peak frequencies either on the island of Ireland or more generally in Northwestern Europe. We chose to examine five of these disorders, namely haemochromatosis, phenylketonuria (PKU),  $\alpha_1$ -antitrypsin deficiency, classic galactosemia (GALT) and cystic fibrosis (CF).

Haemochromatosis is an autosomal recessive condition that occurs in European populations, typified by iron accumulation. Three point mutations in the HFE gene are responsible for the majority of cases, C282Y, H63D and S65C, with C282Y being by far the most penetrant of the three. Ballynahatty appeared

to be a heterozygote for H63D (GATK quality 99; SNP coverage 10X; Allele depths 6X and 4X) and Rathlin1 a heterozygote for C282Y (GATK quality 95; SNP coverage 6X; Allele depths 3X and 3X). As C282Y is a G to A mutation we examined the SNP visually in IGV (83), to check for any higher risk of deamination at these derived A alleles due to read position. However, all A alleles were found to be low risk, situated away from the 3' prime end of reads, with high base quality scores after mapDamage rescaling.

PKU, characterised by an increase in blood phenylalanine concentrations sometimes resulting in hyperphenylalaninaemia, is caused by mutations in phenylalanine hydroxylase gene (PAH), over 400 of which have been identified . The incidence of PKU in Europe is about one case per 10 000 livebirths. This rises to a peak of one in every 4000 in Ireland (84, 85). We examined 29 of the most common PKU mutations in Europe (86) in our samples, including R408W, which is found at highest frequency in the west of Ireland (86), however none of our ancient individuals were found to carry a causative allele.  $\alpha_1$ -antitrypsin deficiency, an autosomal co-dominant disorder, clinically characterised by liver disease and early-onset emphysema, is most frequently caused by one of two mutations in the  $\alpha_1$ -antitrypsin deficiency gene (AAT), the S and the Z alleles (87). The S allele reaches its highest frequencies in Iberia, while the Z allele is most prevalent in the UK, coastal France and the Baltic countries (88). Neither of these alleles were identified in our ancient Irish individuals. Ireland has the world's highest prevalence of cystic fibrosis, an autosomal recessive disorder that affects the lungs and digestive system (89). While over 1700 mutations have been identified in the CFTR gene less than 20 occur at a frequency of over 0.1%, while a single mutation  $\Delta$ F508 accounts for approximately 70% of CF cases (90). None of these mutations were identified in our ancient samples. Classic galactosemia (GALT) is an autosomal recessive metabolic disorder than can result in liver disease, and occurs relatively frequently in Ireland. We explored three mutations commonly associated with the disease, however none of the ancient samples carried a causative allele.

## **S15.4 Classical HLA typing**

Numerous studies have reported a significant association with the C282Y mutation and the HLA-A\*03-B\*07 haplotype (91–95). To investigate this we used HLA\*IMP:02 (96) to infer classical HLA types in the two high coverage genomes. Diploid genotypes for a set of SNPs from HapMap 3 covering the xMHC region of chromosome 6 were called in Ballynahatty and Rathlin1 using the UnifiedGenotyper tool in GATK v2.4-7 (15). Only bases with a quality above 30 were considered for calling (-mbq 30). Genotype

calls were filtered for a depth of coverage of 15X or above and a genotype quality of 30 or above. Data conversion to HLA\*IMP format, quality control, and alignment to the HapMap reference strand was performed by the HLA Imputation front-end program. This resulted in 5262 genotypes in Rathlin1 and 4540 genotypes in Ballynahatty covering the xMHC region used for imputation of HLA types, which was carried out by the HLA\*IMP web service. The results are displayed in Table S15.8. Note that these do not contain inter-locus phasing information.

Rathlin1 was found to be a carrier of both the HLA-A\*0301 and HLA-B\*0702 alleles, associated with the C282Y mutation, further supporting the sample's heterozygote status. Furthermore, Rathlin1, also carries the HLA alleles C\*0702, DRB1\*1501, and DQB1\*0602, which together with A\*0301 and B\*0702 compose the PGF haplotype, one of the most frequent long-range MHC in Northern Europeans (~10%). This haplotype has been shown to offer protection against type 1 diabetes, while predisposing to other diseases such as multiple sclerosis and systemic lupus erythematosus (97–99).

### **S15.5 SNPs with evidence of recent positive selection in humans**

Sample genotypes were also assessed at panel of 19 SNPs that display evidence of recent positive selection, the majority of which have well validated phenotypic associations to diet and immunity. These SNPs were chosen based on a similar SNP panel in the previous high coverage ancient genome study by (21). Sample genotypes and base calls are shown in Table S15.9

The most well documented genomic region associated with dietary change is the LCT lactase persistence locus. The high coverage Neolithic individual, Ballynahatty, was homozygous for the ancestral alleles at both the LCTa and LCTb loci, while the high coverage Bronze Age male was a heterozygote at both positions. Base calls for the two lower coverage Bronze Age samples indicated the presence of the ancestral allele in these individuals.

All four samples, where accurate genotyping was possible, appeared to carry the ancestral alleles at ALDH2, ADH1Ba and ADH1Bb. The derived versions of these alleles are linked to slower alcohol metabolism.

We also evaluated sample genotypes at 6 SNPs in the NAT2 gene used by the NAT2pred tool (<http://nat2pred.rit.albany.edu/>) to determine acetylation phenotype, which can be rapid, intermediate or



slow. The slow phenotype is thought to be under positive selection, possibly related to the advent of farming (100). Phenotype prediction was only possible for our two high coverage genomes, both of which were discovered to be intermediate acetylators.

The final two loci linked to diet examined were FADS1 and NADSYN1, both of which were shown to carry a signal of selection (101), with the most significant SNPs identified as rs174546 and rs7940244 respectively. FADS1 is involved in fatty acid metabolism with the derived allele at rs174546 associated with a decrease in triglyceride levels (102). The Neolithic individual, Ballynahatty, was found to be a heterozygote at this position, while Rathlin1 is most likely a homozygote for the ancestral allele. Variation in NADSYN1 has been linked to circulating vitamin D levels, with high variability in derived allele frequency at rs7940244 across Northern European populations (103, 104). Both high coverage individuals were found to be homozygous for the ancestral allele at this position.

Ancestral alleles were observed at rs17822931 (ABCC1), which determines earwax type (105), and rs3827760 (EDAR), involved in tooth morphology and hair thickness (106). The derived allele at both these loci is found at high frequencies in East Asians and Native Americans today.

**Table S15.1. Ballynahatty, Rathlin1, Rathlin2 and Rathlin3 genotype and base calls for the Hirisplex 24 SNP panel for pigmentation phenotype prediction.**

| Gene           | SNP ID                | Ancestral Allele (fwd) | Derived Allele (fwd) | Ballynahatty (GQ) | Rathlin1 (GQ) | Rathlin2 | Rathlin3 |
|----------------|-----------------------|------------------------|----------------------|-------------------|---------------|----------|----------|
| MC1R           | N29insA               | C                      | insA                 | C/C (21)          | C/C (21)      | -        | -        |
| MC1R           | rs11547464            | G                      | A                    | G/G (57)          | G/G (60)      | G        | -        |
| MC1R           | rs885479              | G                      | A                    | G/G (33)          | G/G (39)      | GG       | -        |
| MC1R           | rs1805008             | C                      | T                    | C/C (21)          | C/C (33)      | C        | -        |
| MC1R           | rs1805005             | G                      | T                    | G/G (30)          | G/G (39)      | GG       | -        |
| MC1R           | rs1805006             | C                      | A                    | C/C (30)          | C/C (39)      | CCC      | -        |
| MC1R           | rs1805007             | C                      | T                    | C/C (42)          | C/C (48)      | C        | C        |
| MC1R           | rs1805009             | G                      | C                    | G/G (30)          | G/G (30)      | -        | -        |
| MC1R           | rs201326893 (Y152OCH) | C                      | A                    | C/C (36)          | C/C (60)      | C        | C        |
| MC1R           | rs2228479             | G                      | A                    | G/G (24)          | G/G (51)      | GG       | -        |
| MC1R           | rs1110400             | T                      | C                    | T/T (33)          | T/T (48)      | T        | T        |
| SCL45A2        | rs28777               | C                      | A                    | A/A (45)          | A/A (21)      | AA       | -        |
| SLC45A2 (MATP) | rs16891982            | C                      | G                    | C/G (99)          | G/G (39)      | GGGG     | G        |
| KITLG          | rs12821256            | T                      | C                    | T/T (39)          | T/T (33)      | CCCCT    | -        |
| EXOC2          | rs4959270             | C                      | A                    | A/A (30)          | C/A (91)      | -        | A        |
| IRF4           | rs12203592            | C                      | T                    | T/T (27)          | C/C (42)      | T        | -        |
| TYR            | rs1042602             | C                      | A                    | C/C (21)          | C/A (99)      | C        | A        |
| OCA2           | rs1800407             | C                      | T                    | C/C (24)          | C/C (30)      | CCCCC    | CC       |
| SLC24A4        | rs2402130             | G                      | A                    | A/A (30)          | A/A (27)      | AA       | AA       |
| HERC2          | rs12913832            | A                      | G                    | A/A (30)          | A/G (99)      | -        | -        |
| PIGU           | rs2378249             | A                      | G                    | A/A (27)          | A/A (27)      | AA       | -        |
| SLC24A4        | rs12896399            | G                      | T                    | G/T (99)          | T/T (36)      | TTT      | G        |
| TYR            | rs1393350             | G                      | A                    | A/G (99)          | G/G (57)      | GG       | G        |
| TYRP1          | rs683                 | A                      | C                    | A/C (99)          | C/C (42)      | A        | A        |

GQ refers to the Genotype Quality outputted from GATK UnifiedGenotyper for the genotype calls of the two genomes with coverage over 10X (Ballynahatty and Rathlin1). Genotype calls are not shown for the two genomes under 2X coverage (Rathlin2 and Rathlin3). Instead all bases calls with a quality above 30 are reported.

**Table S15.2. Hirisplex probabilities for hair and eye colour in Ballynahatty and Rathlin1.**

|             |              | <b>Ballynahatty</b> | <b>Rathlin1</b> |
|-------------|--------------|---------------------|-----------------|
| Hair Colour | Brown        | 0.137               | 0.276           |
|             | Red          | 0                   | 0.001           |
|             | Black        | <b>0.861</b>        | 0.282           |
|             | Blond        | 0.002               | <b>0.441</b>    |
| Hair Shade  | Light        | 0.005               | <b>0.614</b>    |
|             | Dark         | <b>0.995</b>        | 0.386           |
| Eye Colour  | Blue         | 0.002               | 0.229           |
|             | Intermediate | 0.062               | 0.128           |
|             | Brown        | <b>0.973</b>        | <b>0.643</b>    |

The highest probability values for hair shade, hair colour and eye colour are marked in bold.

**Table S15.3. Ballynahatty, Rathlin1, Rathlin2 and Rathlin3 genotype and base calls for three blue-eye associated haplotypes in the OCA2-HERC2 region reported in Donnelly et al., 2012 (79)**

| Haplotype | Gene  | SNP ID     | Ancestral Allele (fwd) | Blue Eye Associated Allele (fwd) | Ballynahatty (GQ) | Rathlin1 (GQ) | Rathlin2 | Rathlin3 |
|-----------|-------|------------|------------------------|----------------------------------|-------------------|---------------|----------|----------|
| BEH1      | OCA2  | rs4778138  | G                      | A                                | A/G (99)          | A/G (99)      | AAA      | A        |
| BEH1      | OCA2  | rs4778241  | A                      | C                                | A/A (45)          | A/C (99)      | A        | CC       |
| BEH1      | OCA2  | rs7495174  | G                      | A                                | A/G (55)          | A/G (51)      | AA       | A        |
| BEH2      | HERC2 | rs1129038  | C                      | T                                | C/C (42)          | C/T (99)      | TT       | -        |
| BEH2      | HERC2 | rs12913832 | A                      | G                                | A/A (30)          | A/G (99)      | -        | -        |
| BEH3      | HERC2 | rs916977   | T                      | C                                | T/T (33)          | T/C (99)      | C        | TC       |
| BEH3      | HERC2 | rs1667394  | C                      | T                                | C/C (51)          | C/T (99)      | T        | -        |

GQ refers to the Genotype Quality outputted from GATK UnifiedGenotyper for the genotype calls of the two genomes with coverage over 10X (Ballynahatty and Rathlin1). Genotype calls are not shown for the two genomes under 2X coverage (Rathlin2 and Rathlin3). Instead all bases calls with a quality above 30 are reported.

**Table S15.4. Ballynahatty, Rathlin1, Rathlin2 and Rathlin3 genotype and base calls for a 13 SNP haplotype in the OCA2-HERC2 region identified in Eiberg et al., 2008 (78) and found in 97% of people with blue eyes.**

| Gene  | SNP ID     | Other Allele (fwd) | Blue Eye Associated Allele (fwd) | Ballynahatty (GQ) | Rathlin1 (GQ) | Rathlin2 | Rathlin3 |
|-------|------------|--------------------|----------------------------------|-------------------|---------------|----------|----------|
| OCA2  | rs4778241  | A                  | C                                | A/A (45)          | A/C (99)      | A        | CC       |
| HERC2 | rs1129038  | C                  | T                                | C/C (42)          | C/T (99)      | TT       | -        |
| HERC2 | rs12593929 | G                  | A                                | G/A (59)          | G/A (53)      | -        | A        |
| HERC2 | rs12913832 | A                  | G                                | A/A (30)          | A/G (99)      | -        | -        |
| HERC2 | rs7183877  | A                  | C                                | C/A (50)          | C/C (30)      | -        | C        |
| HERC2 | rs3935591  | T                  | C                                | T/T (45)          | T/C (99)      | CCC      | CCC      |
| HERC2 | rs7170852  | T                  | A                                | T/T (48)          | T/A (99)      | AAA      | A        |
| HERC2 | rs2238289  | G                  | A                                | G/G (24)          | A/G (99)      | A        | A        |
| HERC2 | rs3940272  | T                  | G                                | T/T (6)           | T/T (3)       | -        | -        |
| HERC2 | rs8028689  | C                  | T                                | T/C (99)          | T/C (87)      | T        | TT       |
| HERC2 | rs2240203  | C                  | T                                | T/C (99)          | T/C (99)      | T        | -        |
| HERC2 | rs11631797 | A                  | G                                | A/A (15)          | A/G (98)      | G        | -        |
| HERC2 | rs916977   | T                  | C                                | T/T (33)          | T/C (99)      | C        | TC       |

GQ refers to the Genotype Quality outputted from GATK UnifiedGenotyper for the genotype calls of the two genomes with coverage over 10X (Ballynahatty and Rathlin1). Genotype calls are not shown for the two genomes under 2X coverage (Rathlin2 and Rathlin3). Instead all bases calls with a quality above 30 are reported.

**Table S15.5. Ballynahatty, Rathlin1, Rathlin2 and Rathlin3 genotype and base calls for 16 SNPs marking the SLC24A5 haplotype (C11) found in virtually all chromosomes carrying the derived light skin colour allele (A111T).**

| SNP ID            | Ancestral Allele (fwd) | Derived allele (fwd) | Ballynahatty (GQ) | Rathlin1 (GQ) | Rathlin2 | Rathlin3 |
|-------------------|------------------------|----------------------|-------------------|---------------|----------|----------|
| rs1834640         | G                      | <b>A</b>             | A/A (24)          | A/A (33)      | A        | -        |
| rs2675345         | G                      | <b>A</b>             | A/A (18)          | A/A (33)      | -        | -        |
| rs2469592         | G                      | <b>A</b>             | A/A (21)          | A/A (30)      | A        | AAAA     |
| rs2470101         | C                      | <b>T</b>             | T/T (45)          | T/T (27)      | TT       | -        |
| rs938505          | C                      | <b>T</b>             | C/C (30)          | C/C (33)      | CC       | -        |
| rs2433354         | T                      | <b>C</b>             | C/T (16)          | C/C (30)      | CC       | C        |
| rs2459391         | G                      | <b>A</b>             | A/A (42)          | A/A (60)      | A        | A        |
| rs2433356         | A                      | <b>G</b>             | G/G (48)          | G/G (51)      | GGG      | G        |
| rs2675347         | G                      | <b>A</b>             | A/A (30)          | A/A (18)      | AA       | AA       |
| rs2675348         | G                      | <b>A</b>             | A/A (30)          | A/A (33)      | AAA      | -        |
| rs1426654 (A111T) | G                      | <b>A</b>             | A/A (42)          | A/A (57)      | -        | -        |
| rs2470102         | G                      | <b>A</b>             | A/A (39)          | A/A (33)      | A        | -        |
| rs16960631        | A                      | <b>G</b>             | A/A (21)          | A/A (54)      | AA       | -        |
| rs2675349         | G                      | <b>A</b>             | A/A (33)          | A/A (42)      | A        | -        |
| rs3817315         | T                      | <b>C</b>             | C/C (51)          | C/C (39)      | CCC      | -        |
| rs7163587         | T                      | <b>C</b>             | C/C (42)          | C/C (36)      | -        | C        |

The allelic state associated with C11 is marked in bold. GQ refers to the Genotype Quality outputted from GATK UnifiedGenotyper for the genotype calls of the two genomes with coverage over 10X (Ballynahatty and Rathlin1). Genotype calls are not shown for the two genomes under 2X coverage (Rathlin2 and Rathlin3). Instead all bases calls with a quality above 30 are reported.

**Table S15.6. Ballynahatty, Rathlin1, Rathlin2 and Rathlin3 genotype and base calls for a panel of 6 SNPs used to diagnose ABO blood type.**

| SNP ID                                 | Ancestral A1 Allele (fwd) | Derived Allele (fwd) | Allele Diagnosed | Ballynahatty (GQ) | Rathlin1 (GQ) | Rathlin2 | Rathlin3 |
|----------------------------------------|---------------------------|----------------------|------------------|-------------------|---------------|----------|----------|
| rs8176719                              | C                         | del                  | O                | C/del (99)        | C/del (99)    | -        | CC       |
| rs505922                               | C                         | T                    | O                | C/T (59)          | C/T (99)      | TC       | -        |
| rs687289                               | A                         | G                    | O                | A/G (19)          | A/G (96)      | AG       | -        |
| rs8176746                              | G                         | T                    | B                | G/G (3)           | G/G (18)      | -        | G        |
| rs8176747                              | C                         | G                    | B                | C/C (3)           | C/C (30)      | -        | C        |
| rs8176704                              | G                         | A                    | A2               | G/G (54)          | G/G (48)      | G        | G        |
| <b>Predicted Blood Group Genotype:</b> |                           |                      |                  | A1/O              | A1/O          | -        | -        |

GQ refers to the Genotype Quality outputted from GATK UnifiedGenotyper for the genotype calls of the two genomes with coverage over 10X (Ballynahatty and Rathlin1). Genotype calls are not shown for the two genomes under 2X coverage (Rathlin2 and Rathlin3). Instead all bases calls with a quality above 30 are reported.

**Table S15.7. Ballynahatty, Rathlin1, Rathlin2 and Rathlin3 genotype and base calls for SNPs associated with autosomal recessive disorders common in Ireland today.**

| <b><math>\alpha</math>1-Antitrypsin deficiency (AAT gene)</b> |               |                               |                             |                          |                      |                 |                 |
|---------------------------------------------------------------|---------------|-------------------------------|-----------------------------|--------------------------|----------------------|-----------------|-----------------|
| <b>Mutation</b>                                               | <b>SNP ID</b> | <b>Ancestral Allele (fwd)</b> | <b>Derived Allele (fwd)</b> | <b>Ballynahatty (GQ)</b> | <b>Rathlin1 (GQ)</b> | <b>Rathlin2</b> | <b>Rathlin3</b> |
| E342K (PI*Z)                                                  | rs28929474    | C                             | T                           | C/C (57)                 | C/C (60)             | CCC             | C               |
| E264V (PI*S)                                                  | rs17580       | T                             | A                           | T/T (48)                 | T/T (27)             | -               | TTT             |
| <b>Haemochromatosis (HFE gene)</b>                            |               |                               |                             |                          |                      |                 |                 |
| <b>Mutation</b>                                               | <b>SNP ID</b> | <b>Ancestral Allele (fwd)</b> | <b>Derived Allele (fwd)</b> | <b>Ballynahatty (GQ)</b> | <b>Rathlin1 (GQ)</b> | <b>Rathlin2</b> | <b>Rathlin3</b> |
| H63D                                                          | rs1799945     | C                             | G                           | C/G (99)                 | C/C (42)             | C               | CCC             |
| S65C                                                          | rs1800730     | A                             | T                           | A/A (33)                 | A/A (48)             | A               | AAA             |
| C282Y                                                         | rs1800562     | G                             | A                           | G/A (24)                 | G/A (95)             | GGG             | -               |
| <b>Cystic Fibrosis (CFTR gene)</b>                            |               |                               |                             |                          |                      |                 |                 |
| <b>Mutation</b>                                               | <b>SNP ID</b> | <b>Ancestral Allele (fwd)</b> | <b>Derived Allele (fwd)</b> | <b>Ballynahatty (GQ)</b> | <b>Rathlin1 (GQ)</b> | <b>Rathlin2</b> | <b>Rathlin3</b> |
| 394delTT                                                      | rs121908769   | TT                            | del                         | TT/TT (30)               | TT/TT (36)           | T               | T               |
| R117H                                                         | rs78655421    | G                             | A                           | G/G (27)                 | G/G (42)             | GGG             | -               |
| 1078delT                                                      | rs121908744   | T                             | del                         | T/T (27)                 | T/T (42)             | -               | T               |
| A455E                                                         | rs74551128    | C                             | A                           | C/C (21)                 | C/C (6)              | -               | C               |
| Delta I507                                                    | rs121908745   | TCT                           | del                         | TCT/TCT (36)             | TCT/TCT(36)          | T               | -               |
| Delta F508                                                    | rs113993960   | CTT                           | del                         | CTT/CTT (42)             | CTT/CTT (36)         | CC              | -               |
| IVS10, G-A, -1                                                | rs76713772    | G                             | A                           | G/G (42)                 | G/G (36)             | G               | GG              |
| G542X                                                         | rs113993959   | G                             | T                           | G/G (33)                 | G/G (36)             | G               | G               |
| G551D                                                         | rs75527207    | G                             | A                           | G/G (21)                 | G/G (27)             | G               | -               |
| R553X                                                         | rs74597325    | C                             | G                           | C/C (21)                 | C/C (21)             | C               | -               |
| A561E                                                         | rs121909047   | C                             | A                           | C/C (42)                 | C/C (24)             | CC              | -               |
| W846X                                                         | rs267606722   | G                             | A                           | G/G (24)                 | G/G (18)             | -               | G               |
| R1066C                                                        | rs78194216    | C                             | T                           | C/C (24)                 | C/T (7)              | CC              | C               |
| R1162X                                                        | rs74767530    | C                             | T                           | C/C (51)                 | C/C (27)             | -               | -               |
| 3659delC                                                      | rs121908811   | C                             | del                         | C/C (51)                 | C/C (33)             | CC              | CCCC            |
| W1282X                                                        | rs77010898    | G                             | A                           | G/G (36)                 | G/G (36)             | GGG             | -               |



| N1303K                            | rs80034486    | C                             | G                           | C/C (21)                 | C/C (15)             | CCCC            | C               |
|-----------------------------------|---------------|-------------------------------|-----------------------------|--------------------------|----------------------|-----------------|-----------------|
| <b>Phenylketonuria (PAH gene)</b> |               |                               |                             |                          |                      |                 |                 |
| <b>Mutation</b>                   | <b>SNP ID</b> | <b>Ancestral Allele (fwd)</b> | <b>Derived Allele (fwd)</b> | <b>Ballynahatty (GQ)</b> | <b>Rathlin1 (GQ)</b> | <b>Rathlin2</b> | <b>Rathlin3</b> |
| IVS12DS, G-A, +1                  | rs5030861     | C                             | T                           | C/C (33)                 | C/C (30)             | CCC             | C               |
| Y414C                             | rs5030860     | T                             | C                           | T/T (24)                 | T/T (36)             | TTTT            | TT              |
| R408Q                             | rs5030859     | C                             | T                           | C/C (24)                 | C/C (33)             | CCCC            | C               |
| R408W-H1                          | rs5030858     | G                             | A                           | G/A (16)                 | G/G (36)             | GGGG            | G               |
| A403V                             | rs5030857     | G                             | A                           | G/G (33)                 | G/G (45)             | GGG             | -               |
| E390G                             | rs5030856     | T                             | C                           | T/T (54)                 | T/T (54)             | TTTTTT          | TT              |
| V388M                             | rs62516101    | C                             | G,T                         | C/C (45)                 | C/C (51)             | CCCCCC          | CC              |
| IVS10AS, G-A, -11                 | rs5030855     | C                             | T                           | C/C (39)                 | C/C (54)             | C               | C               |
| S349P                             | rs62508646    | A                             | C,G                         | A/A (42)                 | A/A (33)             | -               | AA              |
| L348V                             | rs62516092    | G                             | C                           | G/G (42)                 | G/G (33)             | -               | GG              |
| A300S                             | rs5030853     | C                             | A                           | C/C (42)                 | C/C (36)             | C               | C               |
| F299C                             | rs62642933    | A                             | C                           | A/A (39)                 | A/A (36)             | A               | A               |
| IVS7DS, G-A, +1                   | rs5030852     | C                             | A,T                         | C/C (27)                 | C/C (45)             | -               | -               |
| P281L                             | rs5030851     | G                             | A                           | G/G (30)                 | G/G (42)             | -               | -               |
| E280K                             | rs62508698    | C                             | G,T                         | C/C (33)                 | C/C (36)             | C               | -               |
| G272X                             | rs62514952    | C                             | A                           | C/C (33)                 | C/C (33)             | CC              | -               |
| R261Q                             | rs5030849     | C                             | G,T                         | C/C (27)                 | C/C (27)             | C               | -               |
| R261X                             | rs5030850     | G                             | C,A                         | G/G (27)                 | G/G (27)             | GG              | -               |
| R252W                             | rs5030847     | G                             | C,A                         | G/G (24)                 | G/G (27)             | GG              | -               |
| R243X                             | rs62508588    | C                             | T,A                         | C/C (39)                 | C/C (24)             | C               | -               |
| R243X                             | rs5030846     | G                             | A                           | G/G (45)                 | G/G (27)             | G               | -               |
| W187X                             | rs62507336    | C                             | T,G                         | C/C (24)                 | C/C (21)             | C               | -               |
| W187X                             | rs62507272    | A                             | G                           | A/A (21)                 | A/A (24)             | A               | -               |
| R158Q                             | rs5030843     | C                             | T,G                         | C/T (4)                  | C/C (51)             | CC              | C               |
| R111X                             | rs76296470    | G                             | A                           | G/G (45)                 | G/G (51)             | G               | G               |
| A104D                             | rs62642929    | G                             | T                           | G/G (39)                 | G/G (54)             | G               | -               |
| I65T                              | rs75193786    | A                             | T,C,G                       | A/A (63)                 | A/A (33)             | AA              | A               |
| L48S                              | rs5030841     | A                             | G                           | A/A (42)                 | A/A (24)             | AAAA            | A               |
| G46S                              | rs74603784    | C                             | T                           | C/C (42)                 | C/C (21)             | CCCC            | C               |
| F39L                              | rs62642926    | G                             | C                           | G/G (33)                 | G/G (15)             | GGG             | G               |

**Classic Galactosemia (GALT)**

| <b>Mutation</b> | <b>SNP ID</b> | <b>Ancestral Allele (fwd)</b> | <b>Derived Allele (fwd)</b> | <b>Ballynahatty (GQ)</b> | <b>Rathlin1 (GQ)</b> | <b>Rathlin2</b> | <b>Rathlin3</b> |
|-----------------|---------------|-------------------------------|-----------------------------|--------------------------|----------------------|-----------------|-----------------|
| Q1888R          | rs75391579    | A                             | G                           | A/A (33)                 | A/A (39)             | AAAA            | A               |
| R333G           | rs111033800   | C                             | T,G                         | C/T (1)                  | C/C (45)             | CCC             | CC              |
| F194L           | rs111033726   | T                             | C                           | T/T (45)                 | T/T (57)             | TTT             | T               |

GQ refers to the Genotype Quality outputted from GATK UnifiedGenotyper for the genotype calls of the two genomes with coverage over 10X (Ballynahatty and Rathlin1). Genotype calls are not shown for the two genomes under 2X coverage (Rathlin2 and Rathlin3). Instead all bases calls with a quality above 30 are reported.

**Table S15.8. HLA\*IMP2 results for high coverage Irish genomes.**

| <b>Sample</b>       | <b>HLA Locus</b>             | <b>A</b> | <b>B</b> | <b>C</b> | <b>DPB1</b> | <b>DQA1</b> | <b>DQB1</b> | <b>DRB1</b> |
|---------------------|------------------------------|----------|----------|----------|-------------|-------------|-------------|-------------|
| <b>Ballynahatty</b> | <b>Allele 1</b>              | 0201     | 5101     | 1402     | 0401        | 0301        | 0402        | 0801        |
|                     | <b>Posterior Probability</b> | 1        | 0.993    | 1        | 0.933       | 1           | 1           | 1           |
|                     | <b>Allele 2</b>              | 2402     | 1302     | 0501     | 0201        | 0401        | 0302        | 0401        |
|                     | <b>Posterior Probability</b> | 0.973    | 0.242    | 0.987    | 0.84        | 0.993       | 0.993       | 0.873       |
| <b>Rathlin1</b>     | <b>Allele 1</b>              | 0301     | 0702     | 0702     | 0201        | 0102        | 0602        | 1501        |
|                     | <b>Posterior Probability</b> | 1        | 1        | 0.993    | 0.580       | 1           | 0.993       | 1           |
|                     | <b>Allele 2</b>              | 3101     | 2705     | 0202     | 1301        | 0103        | 0603        | 1301        |
|                     | <b>Posterior Probability</b> | 0.653    | 0.973    | 1        | 0.320       | 0.953       | 1           | 0.980       |

Posterior probabilities for the most likely HLA alleles are shown for each locus.

**Table S15.9. Ballynahatty, Rathlin1, Rathlin2 and Rathlin3 genotype and base calls for SNPs that have undergone recent positive selection in modern humans.**

| Gene      | Associated Trait/Function            | SNP ID     | Ancestral Allele (fwd) | Derived Allele (fwd) | Ballynahatty (GQ) | Rathlin1 (GQ) | Rathlin2 | Rathlin3 |
|-----------|--------------------------------------|------------|------------------------|----------------------|-------------------|---------------|----------|----------|
| MCM6/LCTa | Lactase Persistence                  | rs4988235  | G                      | A                    | G/G (21)          | G/A (75)      | AGGGGG   | G        |
| LCTb      | Lactase Persistence                  | rs182549   | C                      | T                    | C/C (45)          | C/T (99)      | CC       | -        |
| FADS1     | Fatty Acid Metabolism                | rs174546   | T                      | C                    | C/T (99)          | T/T (24)      | -        | -        |
| NADSYN1   | Circulating Vitamin D levels         | rs7940244  | C                      | T                    | C/C (48)          | C/C (51)      | TC       | C        |
| ALDH2     | Alcohol Metabolism                   | rs671      | G                      | A                    | G/G (24)          | G/G (30)      | -        | G        |
| ADH1Ba    | Alcohol Metabolism                   | rs3811801  | G                      | A                    | G/G (72)          | G/G (45)      | GGG      | GGGG     |
| ADH1Bb    | Alcohol Metabolism                   | rs1229984  | C                      | T                    | C/C (10)          | C/C (30)      | CC       | -        |
| NAT2      | Acetylation Status                   | rs1041983  | C                      | T                    | C/C (27)          | C/T (99)      | CCT      | -        |
| NAT2      | Acetylation Status                   | rs1801280  | T                      | C                    | T/C (95)          | T/T (51)      | TT       | -        |
| NAT2      | Acetylation Status                   | rs1799929  | C                      | T                    | C/T (57)          | C/C (24)      | CC       | T        |
| NAT2      | Acetylation Status                   | rs1799930  | G                      | A                    | G/G (36)          | G/A (96)      | -        | G        |
| NAT2      | Acetylation Status                   | rs1208     | A                      | G                    | A/G (93)          | A/A (15)      | GAA      | -        |
| NAT2      | Acetylation Status                   | rs1799931  | G                      | A                    | G/G (30)          | G/G (45)      | -        | -        |
| EDAR      | Tooth Morphology and Hair Thickness  | rs3827760  | A                      | G                    | A/A (27)          | A/A (45)      | AAA      | -        |
| ABCC1     | Earwax type                          | rs17822931 | C                      | T                    | C/C (24)          | C/C (24)      | -        | C        |
| AGT       | Hypertension                         | rs699      | G                      | A                    | A/A (24)          | G/G (27)      | -        | A        |
| KITLG     | Melanin pathway                      | rs4590952  | G                      | A                    | A/A (18)          | G/A (56)      | G        | -        |
| CYP3A4    | Protection from some forms of cancer | rs2740574  | C                      | T                    | T/T (36)          | T/T (42)      | T        | -        |
| CYP3A5    | Drug Metabolism                      | rs776746   | T                      | C                    | C/C (42)          | C/C (33)      | -        | -        |

GQ refers to the Genotype Quality outputted from GATK UnifiedGenotyper for the genotype calls of the two genomes with coverage over 10X (Ballynahatty and Rathlin1). Genotype calls are not shown for the two genomes under 2X coverage (Rathlin2 and Rathlin3). Instead all bases calls with a quality above 30 are reported.

## References

1. Beck LA (1995) Standards for data collection from human skeletal remains. Edited by Jane E. Buikstra and Douglas H. Ubelaker. 272 pp. Fayetteville: Arkansas Archeological Survey Research Series No. 44, 1994. \$25.00 (paper). *Am J Hum Biol* 7(5):672–672.
2. Schulting RJ, Murphy E, Carleton Jones, Warren G (2012) New dates from the north and a proposed chronology for Irish court tombs. *Proc R Ir Acad C Archaeol Celt Stud Hist Linguist Lit* 112C:1–60.
3. Whitehouse NJ, et al. (2014) Neolithic agriculture on the European western frontier: the boom and bust of early farming in Ireland. *J Archaeol Sci* 51(0):181–205.
4. Sloan B, Carver N, Murphy E, McGranaghan C (2008) A Bronze Age Cist Burial at Glebe, Rathlin Island, County Antrim. *Ulster Journal of Archaeology* 67:60–83.
5. Murphy E, McGranaghan C (2008) Osteological report on human remains from Glebe, Rathlin Island, County Antrim, pp. 72–83 in Sloan, B., A Bronze Age cist burial at Glebe, Rathlin Island, County Antrim. *Ulster Journal of Archaeology* 67:72–83.
6. Carver N (2008) The Food Vessel, pp. 66–68 in Sloan, B., A Bronze Age Cist Burial at Glebe, Rathlin Island, County Antrim. *Ulster Journal of Archaeology* 67:60–83.
7. Yang DY, Eng B, Waye JS, Dudar JC, Saunders SR (1998) Technical note: improved DNA extraction from ancient bones using silica-based spin columns. *Am J Phys Anthropol* 105(4):539–543.
8. MacHugh DE, Edwards CJ, Bailey JF, Bancroft DR, Bradley DG (2000) The extraction and analysis of ancient DNA from bone and teeth: a survey of current methodologies. *Anc Biomol* 3(2):81–103.
9. Meyer M, Kircher M (2010) Illumina sequencing library preparation for highly multiplexed target capture and sequencing. *Cold Spring Harb Protoc* 2010(6):db.prot5448.
10. Gamba C, et al. (2014) Genome flux and stasis in a five millennium transect of European prehistory. *Nat Commun* 5:5257.
11. Martin M (2011) Cutadapt removes adapter sequences from high-throughput sequencing reads. *EMBnet journal* 17(1):10–12.
12. Li H, Durbin R (2009) Fast and accurate short read alignment with Burrows–Wheeler transform. *Bioinformatics* 25(14):1754–1760.
13. Schubert M, et al. (2012) Improving ancient DNA read mapping against modern reference genomes. *BMC Genomics* 13:178.
14. Li H, et al. (2009) The Sequence Alignment/Map format and SAMtools. *Bioinformatics* 25(16):2078–2079.
15. McKenna A, et al. (2010) The Genome Analysis Toolkit: a MapReduce framework for analyzing next-generation DNA sequencing data. *Genome Res* 20(9):1297–1303.
16. Jónsson H, Ginolhac A, Schubert M, Johnson PLF, Orlando L (2013) mapDamage2.0: fast approximate Bayesian estimates of ancient DNA damage parameters. *Bioinformatics* 29(13):1682–1684.
17. Okonechnikov K, Conesa A, García-Alcalde F (2015) Qualimap 2: advanced multi-sample quality control for high-throughput sequencing data. *Bioinformatics*. doi:10.1093/bioinformatics/btv566.
18. Keller A, et al. (2012) New insights into the Tyrolean Iceman’s origin and phenotype as inferred by whole-genome sequencing. *Nat Commun* 3:698.
19. Skoglund P, et al. (2014) Genomic diversity and admixture differs for Stone-Age Scandinavian foragers and farmers. *Science* 344(6185):747–750.
20. Olalde I, et al. (2014) Derived immune and ancestral pigmentation alleles in a 7,000-year-old Mesolithic European. *Nature* 507(7491):225–228.
21. Lazaridis I, et al. (2014) Ancient human genomes suggest three ancestral populations for present-day Europeans. *Nature* 513(7518):409–413.
22. Seguin-Orlando A, et al. (2014) Paleogenomics. Genomic structure in Europeans dating back at least 36,200 years. *Science* 346(6213):1113–1118.
23. Fu Q, et al. (2014) Genome sequence of a 45,000-year-old modern human from western Siberia. *Nature* 514(7523):445–449.
24. Raghavan M, et al. (2014) Upper Palaeolithic Siberian genome reveals dual ancestry of Native Americans. *Nature* 505(7481):87–91.
25. Haak W, et al. (2015) Massive migration from the steppe was a source for Indo-European languages in Europe. *Nature* 522(7555):207–211.

26. Allentoft ME, et al. (2015) Population genomics of Bronze Age Eurasia. *Nature* 522(7555):167–172.
27. Günther T, et al. (2015) Ancient genomes link early farmers from Atapuerca in Spain to modern-day Basques. *Proceedings of the National Academy of Sciences*. doi:10.1073/pnas.1509851112.
28. Olalde I, et al. (2015) A Common Genetic Origin for Early Farmers from Mediterranean Cardial and Central European LBK Cultures. *Mol Biol Evol*. doi:10.1093/molbev/msv181.
29. Brotherton P, et al. (2007) Novel high-resolution characterization of ancient DNA reveals C> U-type base modification events as the sole cause of post mortem miscoding lesions. *Nucleic Acids Res* 35(17):5717–5728.
30. Briggs AW, et al. (2007) Patterns of damage in genomic DNA sequences from a Neandertal. *Proc Natl Acad Sci U S A* 104(37):14616–14621.
31. Shapiro B, Hofreiter M (2014) A paleogenomic perspective on evolution and gene function: new insights from ancient DNA. *Science* 343(6169):1236573.
32. Vianello D, et al. (2013) HAPLOFIND: a new method for high-throughput mtDNA haplogroup assignment. *Hum Mutat* 34(9):1189–1194.
33. Sánchez-Quinto F, et al. (2012) Genomic affinities of two 7,000-year-old Iberian hunter-gatherers. *Curr Biol* 22(16):1494–1499.
34. Rasmussen M, et al. (2011) An Aboriginal Australian Genome Reveals Separate Human Dispersals into Asia. *Science* 334 (6052 ):94–98.
35. Korneliussen T, Albrechtsen A, Nielsen R (2014) ANGSD: Analysis of Next Generation Sequencing Data. *BMC Bioinformatics* 15(1):356.
36. Seidemann RM, Stojanowski CM, Doran GH (1998) The use of the supero-inferior femoral neck diameter as a sex assessor. *Am J Phys Anthropol* 107(3):305–313.
37. Haas J, Buikstra JE (1994) *Standards for Data Collection from Human Skeletal Remains: Proceedings of a Seminar at the Field Museum of Natural History, Organized by Jonathan Haas* (Arkansas Archeological Survey).
38. Skoglund P, Storå J, Götherström A, Jakobsson M (2013) Accurate sex identification of ancient human remains using DNA shotgun sequencing. *J Archaeol Sci* 40(12):4477–4482.
39. Brandt G, et al. (2013) Ancient DNA reveals key stages in the formation of central European mitochondrial genetic diversity. *Science* 342(6155):257–261.
40. Lacan M, et al. (2011) Ancient DNA reveals male diffusion through the Neolithic Mediterranean route. *Proc Natl Acad Sci U S A* 108(24):9788–9791.
41. Skoglund P, et al. (2012) Origins and genetic legacy of Neolithic farmers and hunter-gatherers in Europe. *Science* 336(6080):466–469.
42. Malmström H, et al. (2009) Ancient DNA Reveals Lack of Continuity between Neolithic Hunter-Gatherers and Contemporary Scandinavians. *Curr Biol* 19(20):1758–1762.
43. Bramanti B, et al. (2009) Genetic discontinuity between local hunter-gatherers and central Europe’s first farmers. *Science* 326(5949):137–140.
44. Fu Q, et al. (2013) A revised timescale for human evolution based on ancient mitochondrial genomes. *Curr Biol* 23(7):553–559.
45. Bollongino R, et al. (2013) 2000 years of parallel societies in Stone Age Central Europe. *Science* 342(6157):479–481.
46. Hervella M, et al. (2012) Ancient DNA from hunter-gatherer and farmer groups from Northern Spain supports a random dispersion model for the Neolithic expansion into Europe. *PLoS One* 7(4):e34417.
47. Malyarchuk B, et al. (2010) The peopling of Europe from the mitochondrial haplogroup U5 perspective. *PLoS One* 5(4):e10285.
48. Richards M, et al. (2000) Tracing European founder lineages in the Near Eastern mtDNA pool. *Am J Hum Genet* 67(5):1251–1276.
49. García O, et al. (2011) Using mitochondrial DNA to test the hypothesis of a European post-glacial human recolonization from the Franco-Cantabrian refuge. *Heredity* 106(1):37–45.
50. Tambets K, et al. (2004) The Western and Eastern Roots of the Saami—the Story of Genetic “Outliers” Told by Mitochondrial DNA and Y Chromosomes. *Am J Hum Genet* 74(4):661–682.
51. Pala M, et al. (2012) Mitochondrial DNA signals of late glacial recolonization of Europe from near eastern refugia. *Am J Hum Genet* 90(5):915–924.
52. Myres NM, et al. (2011) A major Y-chromosome haplogroup R1b Holocene era founder effect in Central and Western Europe. *Eur J Hum Genet* 19(1):95–101.
53. Moore LT, McEvoy B, Cape E, Simms K, Bradley DG (2006) A Y-chromosome signature of hegemony in Gaelic Ireland. *Am J Hum Genet* 78(2):334–338.

54. Chang CC, et al. (2015) Second-generation PLINK: rising to the challenge of larger and richer datasets. *Gigascience* 4:7.
55. Busby GBJ, et al. (2012) The peopling of Europe and the cautionary tale of Y chromosome lineage R-M269. *Proc Biol Sci* 279(1730):884–892.
56. Li JZ, et al. (2008) Worldwide human relationships inferred from genome-wide patterns of variation. *Science* 319(5866):1100–1104.
57. Behar DM, et al. (2010) The genome-wide structure of the Jewish people. *Nature* 466(7303):238–242.
58. Henn BM, et al. (2011) Hunter-gatherer genomic diversity suggests a southern African origin for modern humans. *Proc Natl Acad Sci U S A* 108(13):5154–5162.
59. Hellenthal G, et al. (2014) A genetic atlas of human admixture history. *Science* 343(6172):747–751.
60. 1000 Genomes Project Consortium, et al. (2015) A global reference for human genetic variation. *Nature* 526(7571):68–74.
61. Prüfer K, et al. (2014) The complete genome sequence of a Neanderthal from the Altai Mountains. *Nature* 505(7481):43–49.
62. Patterson N, Price AL, Reich D (2006) Population structure and eigenanalysis. *PLoS Genet* 2(12):e190.
63. Price AL, et al. (2006) Principal components analysis corrects for stratification in genome-wide association studies. *Nat Genet* 38(8):904–909.
64. Alexander DH, Novembre J, Lange K (2009) Fast model-based estimation of ancestry in unrelated individuals. *Genome Res* 19(9):1655–1664.
65. Green RE, et al. (2010) A draft sequence of the Neandertal genome. *Science* 328(5979):710–722.
66. Reich D, Thangaraj K, Patterson N, Price AL, Singh L (2009) Reconstructing Indian population history. *Nature* 461(7263):489–494.
67. Patterson N, et al. (2012) Ancient admixture in human history. *Genetics* 192(3):1065–1093.
68. Gurdasani D, et al. (2015) The African Genome Variation Project shapes medical genetics in Africa. *Nature* 517(7534):327–332.
69. Haak W, et al. (2005) Ancient DNA from the first European farmers in 7500-year-old Neolithic sites. *Science* 310(5750):1016–1018.
70. Patterson N, et al. (2012) Ancient admixture in human history. *Genetics* 192(3):1065–1093.
71. Pemberton TJ, et al. (2012) Genomic patterns of homozygosity in worldwide human populations. *Am J Hum Genet* 91(2):275–292.
72. Kirin M, et al. (2010) Genomic runs of homozygosity record population history and consanguinity. *PLoS One* 5(11):e13996.
73. Lawson DJ, Hellenthal G, Myers S, Falush D (2012) Inference of population structure using dense haplotype data. *PLoS Genet* 8(1):e1002453.
74. Delaneau O, Marchini J, Zagury J-F (2012) A linear complexity phasing method for thousands of genomes. *Nat Methods* 9(2):179–181.
75. Breheny P, Burchett W (2012) visreg: Visualization of regression models. *R package version:2–0*.
76. Team RC (2014) R: A language and environment for statistical computing. R Foundation for Statistical Computing, Vienna, Austria, 2012.
77. Walsh S, et al. (2013) The HRisPlex system for simultaneous prediction of hair and eye colour from DNA. *Forensic Sci Int Genet* 7(1):98–115.
78. Eiberg H, et al. (2008) Blue eye color in humans may be caused by a perfectly associated founder mutation in a regulatory element located within the HERC2 gene inhibiting OCA2 expression. *Hum Genet* 123(2):177–187.
79. Donnelly MP, et al. (2012) A global view of the OCA2-HERC2 region and pigmentation. *Hum Genet* 131(5):683–696.
80. Canfield VA, et al. (2013) Molecular phylogeography of a human autosomal skin color locus under natural selection. *G3* 3(11):2059–2067.
81. Paré G, et al. (2008) Novel association of ABO histo-blood group antigen with soluble ICAM-1: results of a genome-wide association study of 6,578 women. *PLoS Genet* 4(7):e1000118.
82. Wolpin BM, et al. (2009) ABO blood group and the risk of pancreatic cancer. *J Natl Cancer Inst* 101(6):424–431.
83. Robinson JT, et al. (2011) Integrative genomics viewer. *Nat Biotechnol* 29(1):24–26.
84. Blau N, van Spronsen FJ, Levy HL (2010) Phenylketonuria. *Lancet* 376(9750):1417–1427.
85. Zschocke J, Graham CA, Carson DJ, Nevin NC (1995) Phenylketonuria mutation analysis in Northern Ireland: a rapid stepwise approach. *Am J Hum Genet* 57(6):1311–1317.

86. Zschocke J (2003) Phenylketonuria mutations in Europe. *Hum Mutat* 21(4):345–356.
87. Stoller JK, Lacobawan FL, Aboussouan LS (2006) Alpha-1 Antitrypsin Deficiency. *GeneReviews*(®), eds Pagon RA, et al. (University of Washington, Seattle, WA).
88. Blanco I, Fernandez E, Bustillo EF (2001) Alpha-1-antitrypsin PI phenotypes S and Z in Europe: an analysis of the published surveys. *Clin Genet* 60(1):31–41.
89. Farrell P, et al. (2007) Diagnosis of cystic fibrosis in the Republic of Ireland: epidemiology and costs. *Ir Med J* 100(8):557–560.
90. Castellani C, et al. (2008) Consensus on the use and interpretation of cystic fibrosis mutation analysis in clinical practice. *J Cyst Fibros* 7(3):179–196.
91. Barton JC, Acton RT (2002) HLA-A and -B alleles and haplotypes in hemochromatosis probands with HFE C282Y homozygosity in central Alabama. *BMC Med Genet* 3:9.
92. Distante S, et al. (2004) The origin and spread of the HFE-C282Y haemochromatosis mutation. *Hum Genet* 115(4):269–279.
93. Pacho A, et al. (2004) HLA haplotypes associated with hemochromatosis mutations in the Spanish population. *BMC Med Genet* 5:25.
94. Barton JC, Wiener HW, Acton RT, Go RC-P (2005) HLA haplotype A\* 03-B\* 07 in hemochromatosis probands with HFE C282Y homozygosity: frequency disparity in men and women and lack of association with severity of iron overload. *Blood Cells Mol Dis* 34(1):38–47.
95. Rodriguez LM, et al. (2015) Ancestral association between HLA and HFE H63D and C282Y gene mutations from northwest Colombia. *Genet Mol Biol* 38(1):8–13.
96. Dilthey AT, Moutsianas L, Leslie S, McVean G (2011) HLA\* IMP—an integrated framework for imputing classical HLA alleles from SNP genotypes. *Bioinformatics* 27(7):968–972.
97. Traherne JA, et al. (2006) Genetic analysis of completely sequenced disease-associated MHC haplotypes identifies shuffling of segments in recent human history. *PLoS Genet* 2(1):e9.
98. Larsen CE, Alper CA (2004) The genetics of HLA-associated disease. *Curr Opin Immunol* 16(5):660–667.
99. Barcellos LF, et al. (2003) HLA-DR2 dose effect on susceptibility to multiple sclerosis and influence on disease course. *Am J Hum Genet* 72(3):710–716.
100. Patin E, et al. (2006) Deciphering the ancient and complex evolutionary history of human arylamine N-acetyltransferase genes. *Am J Hum Genet* 78(3):423–436.
101. Mathieson I, et al. (2015) *Eight thousand years of natural selection in Europe*.
102. Bokor S, et al. (2010) Single nucleotide polymorphisms in the FADS gene cluster are associated with delta-5 and delta-6 desaturase activities estimated by serum fatty acid ratios. *J Lipid Res* 51(8):2325–2333.
103. Ahn J, et al. (2010) Genome-wide association study of circulating vitamin D levels. *Hum Mol Genet* 19(13):2739–2745.
104. Price AL, et al. (2009) The impact of divergence time on the nature of population structure: an example from Iceland. *PLoS Genet* 5(6):e1000505.
105. Yoshiura K-I, et al. (2006) A SNP in the ABCC11 gene is the determinant of human earwax type. *Nat Genet* 38(3):324–330.
106. Fujimoto A, et al. (2008) A scan for genetic determinants of human hair morphology: EDAR is associated with Asian hair thickness. *Hum Mol Genet* 17(6):835–843.
